1  
2  
3  
4  
5  
6  
7  
8  
9  
10  
11  
12  
13  
14  
15  
16

**Fanconi Anemia FANCM/FNCM-1 and FANCD2/FCD-2 are required for maintaining histone methylation levels and interact with the histone demethylase LSD1/SPR-5 in *C. elegans***

Hyun-Min Kim<sup>\*,§</sup>, Sara E. Beese-Sims<sup>\*</sup>, and Monica P. Colaiácovo<sup>\*</sup>

<sup>\*</sup>Department of Genetics, Harvard Medical School, Boston, MA 02115

<sup>§</sup>School of Pharmaceutical Science and Technology, Tianjin University, Tianjin 300072, China

17  
18  
19

20 **Running title:** FA pathway is linked to LSD1/SPR-5

21

22

23 **Keywords:** LSD1/SPR-5; FANCM/FNKM-1; FCD2/FCD-2; Histone demethylation and DNA  
24 repair; germline

25

26

27 **Corresponding Author:** Monica P. Colaiácovo, Department of Genetics, Harvard Medical

28 School, 77 Avenue Louis Pasteur, NRB – room 334, Boston, MA, 02115. Phone: 617-432-6543;

29 Fax: 617-432-7663; E-mail: [mcolaiacovo@genetics.med.harvard.edu](mailto:mcolaiacovo@genetics.med.harvard.edu)

30

31

32

33

34 **ABSTRACT**

35 The histone demethylase LSD1 was originally discovered as removing methyl groups from di-  
36 and monomethylated histone H3 lysine 4 (H3K4me<sub>2/1</sub>), and several studies suggest it plays roles  
37 in meiosis as well as epigenetic sterility given that in its absence there is evidence of a  
38 progressive accumulation of H3K4me<sub>2</sub> through generations. In addition to transgenerational  
39 sterility, growing evidence for the importance of histone methylation in the regulation of DNA  
40 damage repair has attracted more attention to the field in recent years. However, we are still far  
41 from understanding the mechanisms by which histone methylation is involved in DNA damage  
42 repair and only a few studies have been focused on the roles of histone demethylases in germline  
43 maintenance. Here, we show that the histone demethylase LSD1/CeSPR-5 is interacting with the  
44 Fanconi Anemia (FA) protein FANCM/CeFNCM-1 based on biochemical, cytological and  
45 genetic analyses. LSD1/CeSPR-5 is required for replication stress-induced S-phase checkpoint  
46 activation and its absence suppresses the embryonic lethality and larval arrest observed in *fncm-1*  
47 mutants. FANCM/CeFNCM-1 re-localizes upon hydroxyurea exposure and co-localizes with  
48 FANCD2/CeFCD-2 and LSD1/CeSPR-5 suggesting coordination between this histone  
49 demethylase and FA components to resolve replication stress. Surprisingly, the FA pathway is  
50 required for H3K4me<sub>2</sub> maintenance regardless of the presence of replication stress. Our study  
51 reveals a connection between Fanconi Anemia and epigenetic maintenance, therefore providing  
52 new mechanistic insight into the regulation of histone methylation in DNA repair.

53

## 54 INTRODUCTION

55 Most eukaryotes package their DNA around histones and form nucleosomes to compact the  
56 genome. A nucleosome is the basic subunit of chromatin composed of ~147bp of DNA wrapped  
57 around a protein octamer comprised of two molecules each of four highly conserved core  
58 histones: H2A, H2B, H3, and H4. Core histones can be replaced by various histone variants,  
59 each of which is associated with dedicated functions such as packaging the genome, gene  
60 regulation, DNA repair, and meiotic recombination (TALBERT AND HENIKOFF 2010). Both the N-  
61 and C-terminal tails of core histones are subjected to various types of post-translational  
62 modifications including acetylation, methylation, SUMOylation, phosphorylation, ubiquitination,  
63 ADPribosylation, and biotinylation.

64 Histone demethylases have been linked to a wide range of human carcinomas  
65 (PEDERSEN AND HELIN 2010). Dynamic histone methylation patterns influence DNA double-  
66 strand break (DSB) formation and DNA repair, meiotic crossover events, and transcription levels  
67 (ZHANG AND REINBERG 2001; CLEMENT AND DE MASSY 2017). However, the mechanisms by  
68 which histone modifying enzymes coordinate their efforts to signal for the desired outcome are  
69 not well understood, and even less is known about the role of histone demethylases in promoting  
70 germline maintenance.

71 The mammalian histone demethylase LSD1 was originally discovered as an H3K4me2/1  
72 specific demethylase (SHI *et al.* 2004). Studies in flies and fission yeast revealed increased  
73 sterility in the absence of LSD1, however, the underlying mechanism of function by which LSD1  
74 promotes fertility remained elusive (DI STEFANO *et al.* 2007; LAN *et al.* 2007; RUDOLPH *et al.*  
75 2007). *C. elegans* studies suggested it plays a role in meiosis and LSD1/CeSPR-5 mutant  
76 analysis revealed a progressive sterility accompanied by a progressive accumulation of



77 H3K4me2 on a subset of genes, including spermatogenesis genes (KATZ *et al.* 2009). In addition  
78 to transgenerational sterility, our previous studies discovered that this histone demethylase is  
79 important for double-strand break repair (DSBR) as well as p53-dependent germ cell apoptosis  
80 in the *C. elegans* germline (NOTTKE *et al.* 2011), linking H3K4me2 modulation via SPR-5 to  
81 proper repair of meiotic DSBs for the first time. Other studies supporting the importance of  
82 histone methylation in the regulation of DNA damage repair have attracted more attention to the  
83 field in recent years (HUANG *et al.* 2007; KATZ *et al.* 2009; BLACK *et al.* 2010;  
84 MOSAMMAPARAST *et al.* 2013; PENG *et al.* 2015). However, the mechanisms by which histone  
85 demethylation is involved in DNA damage repair remain unclear and only a few studies have  
86 been focused on its roles in germline maintenance.

87 A growing body of work supports a role for components from the Fanconi Anemia (FA)  
88 pathway in DNA replication fork arrest in addition to inter-strand crosslink (ICL) repair (ADAMO  
89 *et al.* 2010; SCHLACHER *et al.* 2012; RAGHUNANDAN *et al.* 2015; LACHAUD *et al.* 2016). Here, we  
90 show that the histone demethylase LSD1/CeSPR-5 interacts with the Fanconi Anemia (FA)  
91 FANCM/CeFNCM-1 protein based on biochemical, cytological and genetic analyses.  
92 LSD1/CeSPR-5 is required for hydroxyurea (HU)-induced S-phase DNA damage checkpoint  
93 activation and its absence suppresses the embryonic lethality and larval arrest displayed in *fncm-*  
94 *1* mutants. We show that FANCM/CeFNCM-1 re-localizes upon HU exposure and co-localizes  
95 with FANCD2/CeFCD-2 and LSD1/CeSPR-5. We also show that the potential  
96 helicase/translocase domain of FANCM/CeFNCM-1 is necessary for recruiting  
97 FANCD2/CeFCD-2 to the site of replication arrest. Surprisingly, the FA pathway is required for  
98 H3K4me2 maintenance regardless of the presence of replication stress. Our study reveals a link  
99 between Fanconi Anemia and epigenetic maintenance, therefore providing new insights into the

100 functions of the Fanconi Anemia pathway and the regulation of histone methylation in DNA  
101 repair.

102

## 103 **MATERIALS AND METHODS**

### 104 **Strains and alleles**

105 *C. elegans* strains were cultured at 20°C under standard conditions as described in Brenner  
106 (BRENNER 1974). The N2 Bristol strain was used as the wild-type background. The following  
107 mutations and chromosome rearrangements were used: LGI: *fncm-1(tm3148)*, *spr-5(by101)*,  
108 *hT2[bli-4(e937) let-?(q782) qIs48](I; III)*; LGIV: *spo-11(ok79)*, *nT1 [unc-?(n754) let-?(m435)]*  
109 *(IV; V)*, *fcd-2 (tm1298)*, *opIs406 [fan-1p::fan-1::GFP::let-858 3'UTR + unc-119(+)]*(KRATZ *et*  
110 *al.* 2010).

111

### 112 **Transgenic animals**

113 The following set of transgenic worms was generated with CRISPR-Cas9 technology as  
114 described in (KIM AND COLAIACOVO 2014; KIM AND COLAIACOVO 2015c; NORRIS *et al.* 2015).  
115 In brief, the conserved potential helicase motifs were mutated in FNCM-1 (*fncm-1(rj43[S154Q])*)  
116 and *fncm-1(rj44[M247N E248Q K250D])* animals as described in (KIM AND COLAIACOVO 2014;  
117 KIM AND COLAIACOVO 2015c; KIM AND COLAIACOVO 2016). The FNCM-1 tagged animal  
118 (*rj45[fncm-1::GFP::3xFLAG]*) was created with a few modifications of the CRISPR-Cas toolkit  
119 as described in (NORRIS *et al.* 2015). The SPR-5 tagged animal (*rj18[spr-5::GFP::HA + loxP*  
120 *unc-119(+)* loxP]) I; *unc-119(ed3)* III) was generated as described in (DICKINSON *et al.* 2013).  
121 All transgenic lines were outcrossed with wild type between 4 to 6 times.

122

## 123 **Analysis of FNCM-1 protein conservation and motifs**

124 FNCM-1 homology searches and alignments were performed using T-COFFEE  
125 (<http://tcoffee.crg.cat/>) (DI TOMMASO *et al.* 2011). Pfam and Prosite (release 20.70) were used  
126 for zinc-finger motif predictions (SONNHAMMER *et al.* 1997).

127

## 128 **Plasmids**

129 sgRNAs targeting *fncm-1* were created as described in (NORRIS *et al.* 2015; KIM AND  
130 COLAIACOVO 2016). In brief, the top and bottom strands of the sgRNA targeting  
131 oligonucleotides (5 $\mu$ l of 200  $\mu$ M each) were mixed and annealed to generate double-stranded  
132 DNA which then replaced the *Bam*HI and *Not*I fragment in an empty sgRNA expression vector  
133 (pHKMC1, Addgene #67720) using Gibson assembly (NORRIS *et al.* 2015; KIM AND  
134 COLAIACOVO 2016).

135 To build the *fncm-1::GFP::FLAG* donor plasmid, genomic DNA containing up and  
136 downstream ~1kb homology arms were PCR amplified and cloned into the multi cloning site of  
137 the pUC18 plasmid along with GFP and FLAG tags synthesized by IDT. To build the *spr-*  
138 *5::GFP::HA* donor vector, *spr-5* genomic DNA containing up and downstream ~1kb homology  
139 arms together with GFP::HA + loxP *unc-119(+)* loxP were cloned into the ZeroBlunt Topo  
140 vector as described in (DICKINSON *et al.* 2013).

141

## 142 **DNA microinjection**

143 Plasmid DNA was microinjected into the germline as described in (FRIEDLAND *et al.* 2013; TZUR  
144 *et al.* 2013; KIM AND COLAIACOVO 2016). Injection solutions were prepared to contain 5 ng/ $\mu$ l of  
145 pCFJ90 (*Pmyo-2::mCherry*; Addgene), which was used as the co-injection marker, 50-100 ng/ $\mu$ l

146 of the sgRNA vector, 50 ng/ $\mu$ l of the *Peft-3Cas9-SV40 NLS**stbb-2* 3'UTR and 50-100 ng/ $\mu$ l of the  
147 donor vector.

148

#### 149 **Monitoring S-phase progression in the germline**

150 Nuclei in the *C. elegans* germline are positioned in a temporal-spatial manner and both mitotic as  
151 well as meiotic S-phase progression can be monitored at the distal tip (JARAMILLO-LAMBERT *et*  
152 *al.* 2007). To monitor S-phase progression in the germline,  $\sim$  200pmol/ $\mu$ l Cyanine 3-dUTP  
153 (ENZO Cy3-dUTP) was injected into the distal tip of the gonad of 20-24 hours post-L4 worms.  
154 Worms were dissected and immunostained 2.5 hours after injection.

155

#### 156 **DNA damage sensitivity experiments**

157 Young adult homozygous *fncm-1* animals were picked from the progeny of *fncm-1/hT2* parent  
158 animals. To assess for IR sensitivity, animals were treated with 0 and 50 Gy of  $\gamma$ -IR from a Cs<sup>137</sup>  
159 source at a dose rate of 1.8 Gy/min. HU sensitivity was assessed by placing animals on seeded  
160 NGM plates containing 0, 3.5 and 5.5 mM HU for 12-16 hours. For interstrand crosslink  
161 sensitivity, animals were treated with 0 and 25 $\mu$ g/ml of Trioxsalen (trimethylpsoralen; Sigma) in  
162 M9 buffer with slow agitation in the dark for 30 minutes. Worms were exposed to 200 J/m<sup>2</sup> of  
163 UVA. For all embryonic hatching assays, >36 animals were plated, 6 per plate, and hatching was  
164 monitored 60-72 hours after treatment as a readout of mitotic effects given how long it takes to  
165 proceed from the pre-meiotic region to egg laying (JARAMILLO-LAMBERT *et al.* 2010; KIM AND  
166 COLAIACOVO 2015a; KIM AND COLAIACOVO 2015b).

167 For larval arrest assays, L1 worms were plated on NGM plates with either 0 or 5.5 mM  
168 HU and incubated for 12-16 hours. The number of hatched worms and live adults were counted.

169 Each damage condition was replicated at least twice in independent experiments as described in  
170 (KIM AND COLAIACOVO 2015a).

171

## 172 **Immunofluorescence and Western blot analysis**

173 Whole mount preparations of dissected gonads, fixation and immunostaining procedures were  
174 carried out as described in (COLAIACOVO *et al.* 2003). Primary antibodies were used at the  
175 following dilutions: rabbit anti-SPR-5 (Santa Cruz sc-98749, 1:500), rabbit anti-SPR-5 ((NOTTKE  
176 *et al.* 2011), 1:1000 for western blot), rabbit anti-RAD-51 (SDI, 1:20000), rat anti-FCD-2 ((LEE  
177 *et al.* 2010), 1:300), rat anti-RPA-1 ((LEE *et al.* 2010), 1:200), rabbit anti-pCHK1 (Santa Cruz  
178 sc17922, 1:50), chicken anti-GFP (Abcam ab13970, 1:400), and mouse anti-H3K4me2  
179 (Millipore CMA303, 1:200). Secondary antibodies used were: Cy3 anti-rabbit, FITC anti-rabbit,  
180 Cy3 anti-rat, Alexa 488 anti-chicken, and FITC anti-mouse (all from Jackson Immunochemicals),  
181 each at 1:250. Immunofluorescence images were collected at 0.2 $\mu$ m intervals with an IX-70  
182 microscope (Olympus) and a CoolSNAP HQ CCD camera (Roper Scientific) controlled by the  
183 DeltaVision system (Applied Precision). Images were subjected to deconvolution by using the  
184 SoftWoRx 3.3.6 software (Applied Precision).

185 For western blot analysis, age-matched 24 hours post-L4 young adult worms were  
186 washed off of plates with M9 buffer. 6x SDS buffer was added to the worm pellets, which were  
187 then flash frozen in liquid nitrogen and boiled before equal amounts of samples were loaded on  
188 gels for SDS-PAGE separation.

189

## 190 **Co-localization analysis**

191 The co-localization tool in Softworx from Applied Precision was employed for co-localization  
192 analysis (ADLER AND PARMRYD 2010).

193

## 194 **Mass spectrometry analysis**

195 Pellets of age-matched 24 hours post-L4 young adult worms (wild type or *spr-5::GFP::HA*) were  
196 flash-frozen in lysis buffer (50mM HEPES pH 7.4, 1mM EGTA, 3mM MgCl<sub>2</sub>, 300mM KCl, 10%  
197 glycerol, 1% NP-40 with protease inhibitors (Roche 11836153001) using liquid nitrogen and  
198 then ground to a fine powder with a mortar and pestle. Lysis buffer was added to the thawed  
199 worms and samples were sonicated for 30 cycles of 20 seconds each. The soluble fraction of the  
200 lysate was applied to a 0.45µm filter and applied to either anti-HA beads (Sigma E6779) or GFP-  
201 Trap (Chromotek gta-20) that were incubated at 4°C overnight. After 3 washes with lysis buffer  
202 lacking NP-40, the bound proteins were eluted with either 1mg/ml HA peptide (Sigma I2149) or  
203 0.1M glycine and precipitated using the Proteo Extract Protein Precipitation Kit (Calbiochem  
204 539180). The dry pellet was submitted to the Taplin Mass Spectrometry Facility (Harvard  
205 Medical School) for analysis. The wild type sample was used as a negative control to remove  
206 false positive hits.

207

## 208 **Co-immunoprecipitation**

209 Co-immunoprecipitations were performed with worm lysates from FNCM-1 tagged animals  
210 (*rj45[fncm-1::GFP::3xFLAG]*). Lysis buffer was added to the worm lysates and they were  
211 sonicated for 30 cycles of 20 seconds each. The soluble fraction of the lysates was applied to  
212 anti-flag M2 magnetic beads (Sigma) that were incubated at 4°C overnight. Interacting proteins

213 were eluted with glycine buffer (pH 2). Eluates were used for Western blot analysis to confirm  
214 the interaction of SPR-5 and FNCM-1 proteins.

215

## 216 **Statistical analysis**

217 Statistical comparisons between mutants and control worms were carried out using the two-tailed  
218 Mann-Whitney test with a 95% confidence interval. \* $p < 0.05$ .

219

## 220 **RESULTS**

221

### 222 **Mass spectrometry and co-immunoprecipitation analyses reveal that SPR-5 interacts with**

### 223 **FNCM-1**

224 The histone demethylase SPR-5 in *C. elegans* as well as its orthologs in humans have been  
225 reported to function in DSB repair (HUANG *et al.* 2007; KATZ *et al.* 2009; BLACK *et al.* 2010;  
226 NOTTKE *et al.* 2011; MOSAMMAPARAST *et al.* 2013; PENG *et al.* 2015). To better understand the  
227 roles played by SPR-5 in DNA damage repair throughout the germline, we applied a proteomic  
228 approach to search for its interacting partners. Specifically, we performed pull-downs with a  
229 CRISPR-Cas9 engineered transgenic line expressing the endogenous SPR-5 tagged with GFP  
230 and HA (*spr-5::GFP::HA*), which did not display either the embryonic lethality or DSB  
231 sensitivity observed in *spr-5* null mutants (Supplemental Figure 1), followed by liquid  
232 chromatography-mass spectrometry (LC-MS) analysis. The Fanconi anemia (FA) FANCM  
233 homolog in *C. elegans*, FNCM-1, was identified in two independent samples utilizing this  
234 strategy, each processed with  $\alpha$ -HA and  $\alpha$ -GFP antibodies (Table 1). The SPR-5 and FNCM-1  
235 interaction was not detected in control worms with untagged SPR-5 (Table 1) suggesting that  
236 SPR-5's interaction with FANCM/FNCM-1 is specific. Proteins previously shown to interact

237 with SPR-5, such as SPR-1, the ortholog of human co-repressor CoREST, and RCOR-1, an  
238 ortholog of human REST co-repressors 2 and 3 (RCOR2 and RCOR3) (JARRIAULT AND  
239 GREENWALD 2002; LEE *et al.* 2008), were also identified indicating that the pull-down followed  
240 by LC-MS worked efficiently.

241 To further validate the interaction between SPR-5 and FNCM-1, we utilized a functional  
242 CRISPR-Cas9 engineered transgenic line expressing endogenous FNCM-1 tagged with GFP and  
243 FLAG (*fncm-1::GFP::FLAG*; Supplemental figure 2) in co-immunoprecipitation experiments.  
244 We detected SPR-5 in pull-downs done from *fncm-1::GFP::FLAG* worm lysates with an  $\alpha$ -  
245 FLAG antibody, further supporting an SPR-5 and FNCM-1 interaction *in vivo* (Figure 1A).

246

#### 247 **SPR-5 and FNCM-1 cooperate upon DNA replication fork arrest**

248 Since our analysis supports the interaction of SPR-5 with FANCM/FNCM-1 and we previously  
249 demonstrated that SPR-5 is required for DSB repair (NOTTKE *et al.* 2011) we set out to gain  
250 insight into the link between SPR-5 and the FA pathway during DNA repair. To this end, we  
251 examined the sensitivity of *fncm-1* and *spr-5* null mutants to different types of DNA damage  
252 (LEE *et al.* 2010; NOTTKE *et al.* 2011). First, we found that *fncm-1* mutants displayed sensitivity  
253 to HU treatment, which results in replication arrest (Figure 1B and 1C). Specifically, only 61%  
254 of embryos hatched in *fncm-1* mutants compared to 75% for wild type (P=0.0367 by the two-  
255 tailed Mann-Whitney test, 95% C.I.) following an exposure to 3.5mM HU. Moreover, the HU  
256 sensitivity observed in *fncm-1* mutants was suppressed in *fncm-1 spr-5* double mutants  
257 (P=0.0006), while *spr-5* single mutants did not exhibit any sensitivity compared to wild type (P=  
258 0.1120). Similarly, the increased larval arrest observed in *fncm-1* mutants following HU  
259 treatment was also suppressed in *fncm-1 spr-5* double mutants (Figure 1C). Taken together, these



260 observations suggest that FNCM-1 and SPR-5 play a role in DNA repair following collapse of  
261 stalled replication forks.

262 Next we examined the DNA damage sensitivity of *spr-5* and FA pathway mutants to  
263 exogenous DSBs generated by  $\gamma$ -IR. A significant reduction in the levels of hatched embryos was  
264 observed in *spr-5* null mutants compared to wild type animals (Figure 1D, 61% and 89%  
265 respectively, at a dose of 50Gy; P=0.0175 by the two-tailed Mann-Whitney test, 95% C.I.).  
266 However, both *fncm-1* and *fed-2* null mutants, which lack the FANCD2 homolog in worms, were  
267 not sensitive to exogenous DSBs (100% and 90% hatching, respectively) suggesting that the FA  
268 pathway is not involved in DSB repair.

269 Analysis of the sensitivity to DNA interstrand crosslink's (ICLs) revealed that *spr-5*  
270 mutants were not sensitive to ICLs induced by psoralen-UVA in germline nuclei (Figure 1E).  
271 Specifically, 75% of embryos laid by *spr-5* mutants hatched compared to 94% in wild type  
272 (P=0.2307 by the two-tailed Mann-Whitney test, 95% C.I.). However, as expected given that  
273 FNCM-1 is required for ICL repair (COLLIS *et al.* 2006), *fncm-1* mutants exhibited significant  
274 sensitivity as shown by only 55% hatching (P=0.0087). *fncm-1 spr-5* double mutants did not  
275 alter the sensitivity observed in *fncm-1* single mutants (57%, P=0.9176) indicating that SPR-5  
276 does not play a role in ICL repair in germline nuclei (Figure 1E). Altogether, these observations  
277 suggest that the FA pathway may not be involved in DSB repair in conjunction with SPR-5 and  
278 that SPR-5 does not participate in ICL repair along with the FA pathway, but that instead their  
279 interaction is necessary upon DNA replication fork arrest.

280

281 **A potential helicase/translocase domain in FNCM-1 is important for somatic repair**

282 The FANCM *C. elegans* homolog FNCM-1 contains well-conserved helicase/translocase  
283 domains also present from budding yeast to humans (Figure 1F). We generated a  
284 helicase/translocase dead mutant by CRISPR-Cas9 engineering based on helicase/translocase  
285 dead mutants produced in the MPH1 gene in yeast (SCHELLER *et al.* 2000) that contains the  
286 following amino acid changes: M to N, E to Q, and K to D at positions 247, 248, and 250.  
287 Interestingly, the *fncm-1*<sup>NQD</sup> mutant exhibited larval arrest levels similar to that observed in *fcd-2*  
288 null mutants (Figure 1C and 1F, P=0.0247; 84% adults for NQD and 100% for wild type, values  
289 are normalized against untreated controls), suggesting that the potential helicase/translocase  
290 domain (M<sup>247</sup>E<sup>248</sup>K<sup>250</sup>) is important for somatic repair. However, this helicase/translocase  
291 domain is not necessary for DNA repair upon replication fork arrest in the germline (Figure 1B,  
292 P=0.0017 and P=0.7206, compared to *fncm-1* and wild type respectively).

293

294 **FNCM-1 promotes replication fork progression and SPR-5 is required for the formation of**  
295 **single-stranded DNA regions induced by FNCM-1 deficiency**

296 Since FANCM has been implicated in promoting S-phase progression (WHITBY 2010), we  
297 hypothesized that FNCM-1 might have a similar role. To address FNCM-1's potential role in S-  
298 phase progression, we monitored the incorporation of a fluorescent nucleotide during S-phase by  
299 injecting Cyanine-3-dUTP in the *C. elegans* gonad. Although we did not observe overt  
300 differences in the overall length of the gonads in the mutants compared to wild type, we  
301 accounted for this possibility by assessing the relative distance of Cy3-labeled nuclei. We  
302 divided the distance of Cy3-labeled nuclei from the distal tip by the length of the specific gonad  
303 from distal tip to late pachytene. The relative distance between the Cy3-labeled nuclei and the

304 distal tip was reduced significantly in *fncm-1* mutant germlines compared to wild type,  
305 suggesting a slowdown in the rate of S-phase progression in the *fncm-1* mutants (Figure 2,  
306 relative distance of 7.4 for *fncm-1* and 9.5 for wild type,  $P < 0.0001$ ). Consistent with the HU  
307 sensitivity assay, the slowdown in S-phase progression observed in *fncm-1* single mutants was  
308 suppressed in *fncm-1 spr-5* double mutants ( $P < 0.0001$ ). Furthermore, *fncm-1<sup>NQD</sup>* mutants also  
309 displayed a slowdown in S-phase progression, albeit not as severe as that observed for *fncm-1*  
310 null mutants, suggesting that the *fncm-1<sup>NQD</sup>* mutant is likely a hypomorphic allele (Figure 2, 7.4  
311 for *fncm-1* and 8.7 for *fncm-1<sup>NQD</sup>*,  $P = 0.0078$ . Relative distance of 9.5 for wild type and 8.7 for  
312 *fncm-1<sup>NQD</sup>*,  $P = 0.3165$ ). To further validate the Cy3 labeling results we examined the formation of  
313 single-stranded DNA regions as a result of replication blockage by assessing the presence of  
314 RPA-1 signal, which localizes to single-stranded DNA. RPA-1 signal was detected following  
315 treatment with 3.5mM HU in *fncm-1* mutants but not in either wild type or *spr-5* null mutants  
316 (Figure 3A). Moreover, the RPA-1 signal observed in *fncm-1* mutants was suppressed in the  
317 *fncm-1 spr-5* double mutants. Taken together, these observations suggest that FNCM-1 is  
318 required for replication fork progression upon DNA damage and that SPR-5 may be involved in  
319 the formation of the single-stranded DNA regions induced upon absence of FNCM-1 function.

320

### 321 **S-phase DNA damage checkpoint activation is SPR-5-dependent**

322 The DNA replication-dependent S-phase checkpoint is activated upon stress, such as HU  
323 treatment, DNA damage, and the presence of abnormal DNA structures, and results in S-phase  
324 arrest which is characterized by a premeiotic tip exhibiting enlarged nuclear diameters as well as  
325 a reduced number of nuclei in the *C. elegans* germline (BARTEK *et al.* 2004; GARCIA-MUSE AND  
326 BOULTON 2005; KIM AND COLAIACOVO 2014). Since the *spr-5* null mutation suppressed the

327 single-stranded DNA formed in *fncm-1* we examined whether SPR-5 is required for the  
328 activation of the S-phase DNA damage checkpoint.

329 The ratio of mitotic nuclei (+HU/-HU) was not significantly changed in *fncm-1* mutants  
330 compared to wild type suggesting that the S-phase checkpoint is intact (Figure 3B, 0.45 and 0.28,  
331 respectively). However, a significant increase in the number of nuclei was observed in both *spr-5*  
332 single (0.70) and *fncm-1 spr-5* (1.126) double mutants compared to wild type (P=0.0422 and  
333 P=0.0095, respectively), indicating that SPR-5 is required for the S-phase DNA damage  
334 checkpoint and that lack of SPR-5, which causes accumulation of active chromatin (KATZ *et al.*  
335 2009; NOTTKE *et al.* 2011), circumvents proper activation of the S-phase checkpoint.

336 Single-stranded DNA formed at a stalled replication fork is recognized by RPA and this  
337 triggers ATR kinase activation, which results in S phase checkpoint activation by  
338 phosphorylating its downstream target checkpoint kinase 1 (Chk1) (CIMPRICH AND CORTEZ  
339 2008). Consistent with our observations of an impaired S-phase checkpoint, such as the  
340 increased number of mitotic germline nuclei as well as suppressed detection of single-stranded  
341 DNA, we detected a decrease in the levels of phosphorylated CHK-1 (pCHK-1) in these nuclei in  
342 *spr-5* mutants compared to wild type upon 3.5mM HU treatment (Figure 3C, P=0.0053).  
343 Altogether, these data indicate that SPR-5 is required for S-phase DNA damage checkpoint  
344 activation.

345

### 346 **The localization of SPR-5 and the FA pathway components FCD-2, FAN-1, and FNCM-1 is** 347 **altered in response to replication stress**

348 Since our analysis links SPR-5 with the FA pathway via FNCM-1 as functioning at stalled  
349 replication forks, we examined the localization of SPR-5 and factors acting in the FA pathway by

350 immunostaining. Consistent with our previous observation, SPR-5 shows a nuclear-associated  
351 pattern (NOTTKE *et al.* 2011). Interestingly, upon HU treatment, we observed an increase in both  
352 peri-chromosomal SPR-5 signal as well as bright foci on chromatin compared to untreated (-HU)  
353 control wild type (Figure 4A), suggesting a role for the histone demethylase at replication fork  
354 arrest during S-phase. We also observed a brighter and elevated number of FANCD2/FCD-2 as  
355 well as FAN1/FAN-1 chromatin-associated foci following HU treatment, which supports the  
356 function of the *C. elegans* Fanconi Anemia pathway at stalled DNA replication forks, analogous  
357 to recent reports in other species (Figure 4A; (LACHAUD *et al.* 2016; MICHL *et al.* 2016)).  
358 FNCM-1::GFP::FLAG signal was observed as a combination of foci associated with the DAPI-  
359 stained chromosomes as well as a diffuse haze throughout the germline, which was not detected  
360 in the control wild type (Figure 4B and Supplemental figure 2). FNCM-1::GFP::FLAG partly co-  
361 localized with FCD-2 in the absence of any stress (-HU). However, its localization was altered  
362 upon replication fork arrest (+HU), as shown by the reduction of the diffuse germline signal and  
363 increase in bright chromatin-associated foci, suggesting that FNCM-1 responds to replication  
364 stress similar to FCD-2 and FAN-1, consistent with reports in other species (Figure 4B; (XUE *et*  
365 *al.* 2008)). Furthermore, we observed a higher level of co-localization between FNCM-1 and  
366 FCD-2 in the mitotically dividing nuclei at the premeiotic tip and a reduction in the level of co-  
367 localization at the pachytene stage, which supports FNCM-1 and FCD-2's role in replication fork  
368 arrest at the mitotic stage (Figure 4C).

369 While FNCM-1 is known to be required for FCD-2 localization (Figure 4B, (COLLIS *et al.*  
370 2006)), analysis of our helicase-dead *fncm-1<sup>NQD</sup>* mutant revealed a lack of FCD-2 localization,  
371 suggesting that the helicase/translocase domain is required for recruiting FCD-2 (Figure 4B).  
372 This is further supported by the observation that both *fcd-2* null and *fncm-1<sup>NQD</sup>* mutants

373 displayed similar levels of larval arrest (Figure 1C) potentially due to the lack of FCD-2  
374 localization in *fncm-1<sup>NQD</sup>* mutants mimicking *fcd-2* mutants. Taken together, these data support  
375 the idea that FNCM-1 responds to replication fork arrest and recruits downstream players FCD-2  
376 and FAN-1 consistent with previous reports from other species. Also, we show for the first time  
377 that the helicase/translocase domain of FNCM-1 is necessary for recruiting FCD-2.

378

### 379 **SPR-5 co-localizes with FNCM-1**

380 Both SPR-5 and FNCM-1 localize from the premeiotic tip (PMT, mitotic zone) to pachytene  
381 (Figure 5A). We investigated whether SPR-5 and FNCM-1 co-localize on germline nuclei.  
382 However, since SPR-5 exhibits a dispersed localization, not limited to distinct foci, it is not  
383 possible to assess the co-localization of SPR-5 and FNCM-1 by scoring levels of superimposed  
384 foci. To circumvent this issue, we applied a Pearson correlation coefficient method (ADLER AND  
385 PARMRYD 2010). Consistent with their interaction by co-IP and LC-MS analysis, we found a  
386 high level of co-localization for FNCM-1 and SPR-5 (Figure 5B). Average Pearson correlation  
387 coefficient was 0.89 at the premeiotic tip and 0.80 at the pachytene stage in the germline.  
388 Interestingly, upon replication arrest following HU treatment, we found a high level of co-  
389 localization between SPR-5 and FNCM-1 persisting from the premeiotic tip to the pachytene  
390 stage, unlike in the control where this was progressively reduced. These observations support the  
391 idea that cooperation between the H3K4me2 histone demethylase and the FA pathway is  
392 reinforced to deal with replication fork blockage.

393

394 **Two-way interaction of FANCM/FNCM-1 and LSD1/SPR-5: FNCM-1 and FCD-2 are**  
395 **necessary for maintaining proper H3K4 dimethylation levels**

396 Since lack of LSD1/SPR-5 suppresses the HU sensitivity observed in *fncm-1* mutants, we next  
397 examined whether H3K4me2, which is regulated by the SPR-5 histone demethylase (KATZ *et al.*  
398 2009; NOTTKE *et al.* 2011), was altered by the lack of FNCM-1. Surprisingly, we observed an  
399 increase in the levels of H3K4me2 in mutants lacking *fncm-1* suggesting a bidirectional  
400 functional interaction between SPR-5 and FNCM-1 (Figure 6A, numbers represent mean data  
401 from three independent experiments). Furthermore, H3K4me2 levels are also increased in *fcd-2*  
402 mutants, indicating that not only FANCM/FNCM-1 but also the FA pathway is necessary for  
403 maintaining histone demethylation together with LSD1/SPR-5. Although, we cannot rule out the  
404 possibility that the increase in H3K4me2 levels could be an indirect consequence resulting, for  
405 example, from alterations to cell cycle progression in the mutants.

406 A previous study reported that human FANCD2 and FANCI are required for histone H3  
407 exchange when cells are saturated with mitomycin C-induced DNA ICLs (SATO *et al.* 2012).  
408 Since defective H3 mobility possibly interferes with the accurate interpretation of H3K4  
409 dimethylation levels, we normalized the H3K4me2 value to alpha-tubulin in addition to H3.  
410 Although we observed changes in the normalized level of H3K4me2, the overall conclusion from  
411 this analysis was not altered.

412 Since we observed an inverse correlation between the FA components and the levels of  
413 H3K4me2, we also examined the level of SPR-5 protein expression in *fncm-1* and *fcd-2* mutants  
414 in the absence or presence of HU exposure. However, the normalized expression level of SPR-5  
415 against alpha-tubulin was not altered in wild type with or without HU exposure (Figure 6B).  
416 Also, FA mutants did not affect the level of SPR-5 expression regardless of HU exposure. These

417 observations show that the level of H3K4me2 is not regulated by the level of expression of SPR-  
418 5 protein when replication forks stall. Taken together, our data support a two-way functional  
419 interaction between SPR-5 and the FA pathway in the germline: 1) in the activation of the S-  
420 phase DNA damage checkpoint in response to stalled replication forks, and 2) in the regulation  
421 of H3K4me2.

422

## 423 **DISCUSSION**

424 Several studies have investigated the connections between epigenetic marks and DNA repair,  
425 however, the mechanisms by which epigenetic marks work in DNA repair remained unclear.  
426 Here, we show that the histone demethylase LSD1/CeSPR-5 interacts with the Fanconi Anemia  
427 FANCM/CeFNCM-1 protein based on biochemical, cytological and genetic analyses. LSD-  
428 1/CeSPR-5 is required for activation of the S-phase DNA damage checkpoint. Surprisingly, the  
429 FA pathway is required for H3K4me2 maintenance. Although a previous mouse study reported  
430 that FANCD2 modulates H3K4me2 at the sex chromosome, their analysis was confined to  
431 immunostaining (ALAVATTAM *et al.* 2016). With biochemical, cytological and genetic analyses,  
432 our study reveals that the FA pathway is necessary for epigenetic maintenance and sheds light on  
433 understanding the epigenetic mechanisms underlying Fanconi Anemia.

434

### 435 **The FA pathway responds to HU-induced replication fork arrest**

436 The Fanconi Anemia pathway has been mainly studied in mitotically dividing cells but not in  
437 germline nuclei. In this study we identified a dynamic localization pattern for FNCM-1, FCD-2,  
438 FAN-1 and LSD-1/CeSPR-5 upon replication fork arrest induced by HU exposure (Figure 4A  
439 and 4B). In addition, co-localization, supported by an increased co-localization correlation



440 coefficient, and co-IP results suggest that SPR-5 and FNCM-1 work together in response to  
441 replication fork arrest (Figures 1 and 5). Interestingly, *spr-5* mutants displayed DSB sensitivity  
442 but not the HU-induced replication fork sensitivity observed in *fncm-1* mutants (Figure 1D and  
443 Figure 1B, P=0.0175 and P=0.1720, respectively). However, a mild but significant reduction in  
444 larval arrest was observed (Figure 1C, P=0.0285, 100% for wild type and 79% for *spr-5*),  
445 suggesting a role for SPR-5 in mitotic cell division upon DNA replication stress. The interaction  
446 between these two proteins, as well as their altered localization upon HU stress, suggest that  
447 SPR-5 and FNCM-1 work together upon replication fork arrest.

448

#### 449 **SPR-5 is necessary for activation of the DNA damage checkpoint**

450 The S-phase checkpoint failure observed in *spr-5* mutants can be due to an impaired checkpoint  
451 signaling pathway *per se*. Suppression of the formation of a single-stranded DNA region in the  
452 *fncm-1 spr-5* double mutants (Figure 3A) suggests that SPR-5 may function in replication fork  
453 stalling/pause and that being deficient for SPR-5 prevents fork stalling, which then circumvents  
454 S-phase checkpoint activation. The defective checkpoint was observed at a lower (3.5mM) but  
455 not at a higher (5.5mM) dose of HU, suggesting that an alternative/redundant mechanism for S-  
456 phase checkpoint activation is triggered under severe replication stress conditions (Supplemental  
457 figure 3). It is worth noting that a similar role in checkpoint function was proposed in fission  
458 yeast for the Lsd1/2 histone demethylases which are indispensable for replication fork pause  
459 within the ribosomal DNA region (HOLMES *et al.* 2012).

460

461 **Fanconi Anemia components are required for proper H3K4me2 levels regardless of**  
462 **replication fork arrest**

463 Surprisingly, FNCM-1 and FCD-2 were necessary to maintain proper H3K4me2 levels  
464 regardless of replication fork arrest (Figure 6). Since HU-induced replication arrest accumulates  
465 active chromatin marks during S-phase, the slowing down of S-phase observed in *fncm-1*  
466 mutants may result in H3K4me2 accumulation (Figure 2A, 3A and 6A, (ALPER *et al.* 2012)).  
467 However, this does not explain how FCD-2, which did not alter S-phase progression, is required  
468 for H3K4me2 with or without replication stress (Figure 2B and 6A). This suggests that, in  
469 addition to promoting the S-phase induced euchromatic state, the FA pathway may have an  
470 alternative role in maintaining histone methylation.

471 Although the FA pathway is connected to the regulation of histone demethylation  
472 regardless of the presence of stalled replication, a direct role for the FA pathway in histone  
473 demethylation became more evident when *fncm-1 spr-5* double mutants suppressed H3K4me2  
474 upon HU arrest unlike either single mutant (Figure 6A). One possibility is that a defective  
475 checkpoint in *spr-5* somehow gains synergy in *fncm-1* mutants. Alternatively, a severe  
476 accumulation of dimethylation displayed in the double mutants may trigger/activate other histone  
477 demethylases. In fact, the LSD2 ortholog in *C. elegans*, *amx-1*, has been reported to be up-  
478 regulated over five-fold in *spr-5* mutants supporting this idea (KATZ *et al.* 2009; NOTTKE *et al.*  
479 2011).

480

481 **The potential helicase domain (MEK) of FNCM-1 is necessary for recruiting FCD-2**

482 Although *C. elegans* FNCM-1 displayed relatively less conservation of its DExD/H domain  
483 compared to other species, its flanking sequences are still well conserved (Figure 1F). Previous

484 studies reported that the helicase domain of budding yeast Mph1, an ortholog of human FANCM,  
485 was required for mitotic crossover formation (PRAKASH *et al.* 2009). Interestingly, mutations in  
486 the potential helicase domain (MEK to NQD) of FNCM-1 resulted in loss of FCD-2 localization  
487 and a slowdown of S-phase progression (Figure 2). Moreover, it also led to larval arrest upon  
488 replication fork arrest comparable to that observed in *fcd-2* mutants, albeit not as severe as  
489 observed in *fncm-1* mutants (Figure 1C), which supports our observation that this domain in  
490 FNCM-1 is necessary to recruit the downstream FA pathway component FCD-2 (Figure 4B).

491 Fanconi Anemia (FA) is a rare genetic disorder but still the most frequent inherited  
492 instability syndrome, characterized by bone marrow failure, hypersensitivity to cross-linking  
493 agents and a high risk for acute myeloid leukemia, ataxia aelangiectasia, xeroderma  
494 pigmentosum, and Bloom, Werner, Nijmegen, Li-Fraumeni and Seckel syndromes (SCHROEDER  
495 1982). Recent studies emphasize the role of Fanconi Anemia components in DNA replication  
496 arrest in addition to inter-strand crosslink repair (BLACKFORD *et al.* 2012; LACHAUD *et al.* 2016).  
497 Our findings that the FA pathway has a role in maintaining histone H3 K4 dimethylation  
498 regardless of replication stress supplies an important connection between DNA damage repair  
499 and epigenetic regulation (Figure 7). Furthermore, *fncm-1* mutants that are defective in recruiting  
500 FCD-2 will assist to define the precise contribution of the FA genes in this regulation.

501

## 502 **ACKNOWLEDGEMENTS**

503 We thank Doris Lui for comments on the manuscript and members of Colaiácovo laboratory for  
504 discussions. We thank Dr. Koo for the RPA-1 and FCD-2 antibodies. This work was supported  
505 by a Ruth L. Kirschstein National Research Service award to SBS (F32GM100515) and a  
506 National Institutes of Health grant R01GM105853 to MPC.

507

508 **REFERENCES**

509

- 510 Adamo, A., S. J. Collis, C. A. Adelman, N. Silva, Z. Horejsi *et al.*, 2010 Preventing  
511 nonhomologous end joining suppresses DNA repair defects of Fanconi anemia. *Mol Cell*  
512 **39**: 25-35.
- 513 Adler, J., and I. Parmryd, 2010 Quantifying colocalization by correlation: the Pearson correlation  
514 coefficient is superior to the Mander's overlap coefficient. *Cytometry A* **77**: 733-742.
- 515 Alavattam, K. G., Y. Kato, H. S. Sin, S. Maezawa, I. J. Kowalski *et al.*, 2016 Elucidation of the  
516 Fanconi Anemia Protein Network in Meiosis and Its Function in the Regulation of  
517 Histone Modifications. *Cell Rep* **17**: 1141-1157.
- 518 Alper, B. J., B. R. Lowe and J. F. Partridge, 2012 Centromeric heterochromatin assembly in  
519 fission yeast--balancing transcription, RNA interference and chromatin modification.  
520 *Chromosome Res* **20**: 521-534.
- 521 Bartek, J., C. Lukas and J. Lukas, 2004 Checking on DNA damage in S phase. *Nat Rev Mol Cell*  
522 *Biol* **5**: 792-804.
- 523 Black, J. C., A. Allen, C. Van Rechem, E. Forbes, M. Longworth *et al.*, 2010 Conserved  
524 antagonism between JMJD2A/KDM4A and HP1gamma during cell cycle progression.  
525 *Mol Cell* **40**: 736-748.
- 526 Blackford, A. N., R. A. Schwab, J. Nieminuszczy, A. J. Deans, S. C. West *et al.*, 2012 The DNA  
527 translocase activity of FANCM protects stalled replication forks. *Hum Mol Genet* **21**:  
528 2005-2016.
- 529 Brenner, S., 1974 The genetics of *Caenorhabditis elegans*. *Genetics* **77**: 71-94.
- 530 Cimprich, K. A., and D. Cortez, 2008 ATR: an essential regulator of genome integrity. *Nat Rev*  
531 *Mol Cell Biol* **9**: 616-627.
- 532 Clement, J., and B. de Massy, 2017 Birth and death of a protein. *Elife* **6**.
- 533 Colaiacovo, M. P., A. J. MacQueen, E. Martinez-Perez, K. McDonald, A. Adamo *et al.*, 2003  
534 Synaptonemal complex assembly in *C. elegans* is dispensable for loading strand-  
535 exchange proteins but critical for proper completion of recombination. *Dev Cell* **5**: 463-  
536 474.
- 537 Collis, S. J., L. J. Barber, J. D. Ward, J. S. Martin and S. J. Boulton, 2006 *C. elegans* FANCD2  
538 responds to replication stress and functions in interstrand cross-link repair. *DNA Repair*  
539 *(Amst)* **5**: 1398-1406.
- 540 Di Stefano, L., J. Y. Ji, N. S. Moon, A. Herr and N. Dyson, 2007 Mutation of *Drosophila* Lsd1  
541 disrupts H3-K4 methylation, resulting in tissue-specific defects during development. *Curr*  
542 *Biol* **17**: 808-812.
- 543 Di Tommaso, P., S. Moretti, I. Xenarios, M. Orobitg, A. Montanyola *et al.*, 2011 T-Coffee: a  
544 web server for the multiple sequence alignment of protein and RNA sequences using  
545 structural information and homology extension. *Nucleic Acids Res* **39**: W13-17.
- 546 Dickinson, D. J., J. D. Ward, D. J. Reiner and B. Goldstein, 2013 Engineering the *Caenorhabditis*  
547 *elegans* genome using Cas9-triggered homologous recombination. *Nat Methods* **10**:  
548 1028-1034.

- 549 Friedland, A. E., Y. B. Tzur, K. M. Esvelt, M. P. Colaiacovo, G. M. Church *et al.*, 2013  
550 Heritable genome editing in *C. elegans* via a CRISPR-Cas9 system. *Nat Methods* 10:  
551 741-743.
- 552 Garcia-Muse, T., and S. J. Boulton, 2005 Distinct modes of ATR activation after replication  
553 stress and DNA double-strand breaks in *Caenorhabditis elegans*. *EMBO J* 24: 4345-4355.
- 554 Holmes, A., L. Roseaulin, C. Schurra, H. Waxin, S. Lambert *et al.*, 2012 Lsd1 and lsd2 control  
555 programmed replication fork pauses and imprinting in fission yeast. *Cell Rep* 2: 1513-  
556 1520.
- 557 Huang, J., R. Sengupta, A. B. Espejo, M. G. Lee, J. A. Dorsey *et al.*, 2007 p53 is regulated by  
558 the lysine demethylase LSD1. *Nature* 449: 105-108.
- 559 Jaramillo-Lambert, A., M. Ellefson, A. M. Villeneuve and J. Engebrecht, 2007 Differential  
560 timing of S phases, X chromosome replication, and meiotic prophase in the *C. elegans*  
561 germ line. *Dev Biol* 308: 206-221.
- 562 Jaramillo-Lambert, A., Y. Harigaya, J. Vitt, A. Villeneuve and J. Engebrecht, 2010 Meiotic  
563 errors activate checkpoints that improve gamete quality without triggering apoptosis in  
564 male germ cells. *Current biology : CB* 20: 2078-2089.
- 565 Jarriault, S., and I. Greenwald, 2002 Suppressors of the egg-laying defective phenotype of sel-12  
566 presenilin mutants implicate the CoREST corepressor complex in LIN-12/Notch  
567 signaling in *C. elegans*. *Genes Dev* 16: 2713-2728.
- 568 Katz, D. J., T. M. Edwards, V. Reinke and W. G. Kelly, 2009 A *C. elegans* LSD1 demethylase  
569 contributes to germline immortality by reprogramming epigenetic memory. *Cell* 137:  
570 308-320.
- 571 Kim, H. M., and M. P. Colaiacovo, 2014 ZTF-8 Interacts with the 9-1-1 Complex and Is  
572 Required for DNA Damage Response and Double-Strand Break Repair in the *C. elegans*  
573 Germline. *PLoS Genet* 10: e1004723.
- 574 Kim, H. M., and M. P. Colaiacovo, 2015a DNA Damage Sensitivity Assays in *Caenorhabditis*  
575 *elegans*. *Bio-Protocol Bio-protocol* 5(11): e1487.
- 576 Kim, H. M., and M. P. Colaiacovo, 2015b New Insights into the Post-Translational Regulation of  
577 DNA Damage Response and Double-Strand Break Repair in *Caenorhabditis elegans*.  
578 *Genetics*.
- 579 Kim, H. M., and M. P. Colaiacovo, 2015c New Insights into the Post-Translational Regulation of  
580 DNA Damage Response and Double-Strand Break Repair in *Caenorhabditis elegans*.  
581 *Genetics* 200: 495-504.
- 582 Kim, H. M., and M. P. Colaiacovo, 2016 CRISPR-Cas9-Guided Genome Engineering in *C.*  
583 *elegans*. *Curr Protoc Mol Biol* 115: 31 37 31-31 37 18.
- 584 Kratz, K., B. Schopf, S. Kaden, A. Sendoel, R. Eberhard *et al.*, 2010 Deficiency of FANCD2-  
585 associated nuclease KIAA1018/FAN1 sensitizes cells to interstrand crosslinking agents.  
586 *Cell* 142: 77-88.
- 587 Lachaud, C., A. Moreno, F. Marchesi, R. Toth, J. J. Blow *et al.*, 2016 Ubiquitinated Fancd2  
588 recruits Fan1 to stalled replication forks to prevent genome instability. *Science* 351: 846-  
589 849.
- 590 Lan, F., M. Zariatigui, J. Villen, M. W. Vaughn, A. Verdel *et al.*, 2007 *S. pombe* LSD1  
591 homologs regulate heterochromatin propagation and euchromatic gene transcription. *Mol*  
592 *Cell* 26: 89-101.

- 593 Lee, I., B. Lehner, C. Crombie, W. Wong, A. G. Fraser *et al.*, 2008 A single gene network  
594 accurately predicts phenotypic effects of gene perturbation in *Caenorhabditis elegans*.  
595 *Nat Genet* 40: 181-188.
- 596 Lee, K. Y., K. Y. Chung and H. S. Koo, 2010 The involvement of FANCM, FANCI, and  
597 checkpoint proteins in the interstrand DNA crosslink repair pathway is conserved in *C.*  
598 *elegans*. *DNA Repair (Amst)* 9: 374-382.
- 599 Michl, J., J. Zimmer, F. M. Buffa, U. McDermott and M. Tarsounas, 2016 FANCD2 limits  
600 replication stress and genome instability in cells lacking BRCA2. *Nat Struct Mol Biol*.
- 601 Mosammamarast, N., H. Kim, B. Laurent, Y. Zhao, H. J. Lim *et al.*, 2013 The histone  
602 demethylase LSD1/KDM1A promotes the DNA damage response. *J Cell Biol* 203: 457-  
603 470.
- 604 Norris, A. D., H. M. Kim, M. P. Colaiacovo and J. A. Calarco, 2015 Efficient Genome Editing in  
605 *Caenorhabditis elegans* with a Toolkit of Dual Marker Selection Cassettes. *Genetics*.
- 606 Nottke, A. C., S. E. Beese-Sims, L. F. Pantalena, V. Reinke, Y. Shi *et al.*, 2011 SPR-5 is a  
607 histone H3K4 demethylase with a role in meiotic double-strand break repair. *Proc Natl*  
608 *Acad Sci U S A* 108: 12805-12810.
- 609 Pedersen, M. T., and K. Helin, 2010 Histone demethylases in development and disease. *Trends*  
610 *in cell biology* 20: 662-671.
- 611 Peng, B., J. Wang, Y. Hu, H. Zhao, W. Hou *et al.*, 2015 Modulation of LSD1 phosphorylation by  
612 CK2/WIP1 regulates RNF168-dependent 53BP1 recruitment in response to DNA damage.  
613 *Nucleic Acids Res* 43: 5936-5947.
- 614 Prakash, R., D. Satory, E. Dray, A. Papusha, J. Scheller *et al.*, 2009 Yeast Mph1 helicase  
615 dissociates Rad51-made D-loops: implications for crossover control in mitotic  
616 recombination. *Genes Dev* 23: 67-79.
- 617 Raghunandan, M., I. Chaudhury, S. L. Kelich, H. Hanenberg and A. Soback, 2015 FANCD2,  
618 FANCI and BRCA2 cooperate to promote replication fork recovery independently of the  
619 Fanconi Anemia core complex. *Cell Cycle* 14: 342-353.
- 620 Rudolph, T., M. Yonezawa, S. Lein, K. Heidrich, S. Kubicek *et al.*, 2007 Heterochromatin  
621 formation in *Drosophila* is initiated through active removal of H3K4 methylation by the  
622 LSD1 homolog SU(VAR)3-3. *Mol Cell* 26: 103-115.
- 623 Sato, K., M. Ishiai, K. Toda, S. Furukoshi, A. Osakabe *et al.*, 2012 Histone chaperone activity of  
624 Fanconi anemia proteins, FANCD2 and FANCI, is required for DNA crosslink repair.  
625 *EMBO J* 31: 3524-3536.
- 626 Scheller, J., A. Schurer, C. Rudolph, S. Hettwer and W. Kramer, 2000 MPH1, a yeast gene  
627 encoding a DEAH protein, plays a role in protection of the genome from spontaneous and  
628 chemically induced damage. *Genetics* 155: 1069-1081.
- 629 Schlacher, K., H. Wu and M. Jasin, 2012 A distinct replication fork protection pathway connects  
630 Fanconi anemia tumor suppressors to RAD51-BRCA1/2. *Cancer Cell* 22: 106-116.
- 631 Schroeder, T. M., 1982 Genetically determined chromosome instability syndromes. *Cytogenet*  
632 *Cell Genet* 33: 119-132.
- 633 Shi, Y., F. Lan, C. Matson, P. Mulligan, J. R. Whetstone *et al.*, 2004 Histone demethylation  
634 mediated by the nuclear amine oxidase homolog LSD1. *Cell* 119: 941-953.
- 635 Sonnhammer, E. L., S. R. Eddy and R. Durbin, 1997 Pfam: a comprehensive database of protein  
636 domain families based on seed alignments. *Proteins* 28: 405-420.
- 637 Talbert, P. B., and S. Henikoff, 2010 Histone variants--ancient wrap artists of the epigenome.  
638 *Nat Rev Mol Cell Biol* 11: 264-275.



639 Tzur, Y. B., A. E. Friedland, S. Nadarajan, G. M. Church, J. A. Calarco *et al.*, 2013 Heritable  
640 custom genomic modifications in *Caenorhabditis elegans* via a CRISPR-Cas9 system.  
641 *Genetics* 195: 1181-1185.  
642 Whitby, M. C., 2010 The FANCM family of DNA helicases/translocases. *DNA Repair (Amst)* 9:  
643 224-236.  
644 Xue, Y., Y. Li, R. Guo, C. Ling and W. Wang, 2008 FANCM of the Fanconi anemia core  
645 complex is required for both monoubiquitination and DNA repair. *Hum Mol Genet* 17:  
646 1641-1652.  
647 Zhang, Y., and D. Reinberg, 2001 Transcription regulation by histone methylation: interplay  
648 between different covalent modifications of the core histone tails. *Genes Dev* 15: 2343-  
649 2360.  
650

## 651 **FIGURE LEGENDS**

652  
653 **Figure 1. FANCM/CeFANCM-1 interacts with histone demethylase LSD1/CeSPR-5 and**  
654 **displays hydroxyurea-induced replication stress sensitivity that is suppressed in *spr-5***  
655 **mutants**

656 **A.** Western blots showing co-immunoprecipitation (co-IP) of FANCM-1 and SPR-5 from *fncm-*  
657 *1::GFP::FLAG* transgenic whole worm lysates with anti-FLAG and anti-SPR-5 antibodies,  
658 respectively. Input represents a concentrated whole worm lysate sample prepared for co-IP. A  
659 wild type (N2) worm lysate is shown as a control for anti-SPR-5 and anti-FLAG antibodies. IgG  
660 is used as a control for the IP. **B.** and **C.** Relative percentage of hatching and larval arrest for the  
661 indicated genotypes after treatment with 3.5mM and 5.5mM hydroxyurea (HU), respectively.  
662 Relative values are calculated against the absence of treatment. **D.** FANCM-1 and FCD-2 are not  
663 required for DSB repair. *fncm-1* and *fcd-2* mutants did not exhibit a decrease in embryonic  
664 viability (shown as % hatching) compared to wild type following exogenous DSB formation by  
665  $\gamma$ -IR exposure (P=0.0530, 100% hatching for *fncm-1* and P=0.8357, 90% hatching for *fcd-2*).  
666 Asterisks indicate statistical significance. P values calculated by the two-tailed Mann-Whitney  
667 test, 95% C.I. **E.** Relative percentage of hatching for the indicated genotypes after treatment with

668 0 and 25µg/ml of trimethylpsoralen-UVA. Asterisks indicate statistical significance; P values  
669 were calculated by the two-tailed Mann-Whitney test, 95% C.I. **F.** Representation of the  
670 helicase/translocase amino acid sequence conservation of *C. elegans* FNCM-1 and its homologs  
671 in *H. sapiens*, *M. musculus*, *D. melanogaster*, *X. tropicalis*, *S. pombe*, and *S. cerevisiae*.  
672 Alignment was performed using T-COFFEE and Pfam (<http://pfam.sanger.ac.uk>). Dark gray  
673 boxes (\*) indicate amino acid identity and light gray boxes (:) indicate similarity. Three vertical  
674 dots inside the green boxes indicate the position of the represented amino acid sequence. The  
675 location of the MEK to NQD mutation in the *C. elegans* sequence is underlined (MELK).

676

677 **Figure 2. FNCM-1 is required for S-phase progression and impaired S-phase progression**  
678 **in *fncm-1* mutants is suppressed by lack of SPR-5**

679 **A.** Cyanine-3-dUTP was injected into *C. elegans* gonads to monitor S-phase progression. Top,  
680 the distance between the Cy3-labeled nuclei and the distal tip (\*) was measured for at least four  
681 gonads for each of the indicated genotypes. Bar, 2 µm. Bottom, diagram of the *C. elegans*  
682 germline indicating the mitotic (premeiotic tip) and meiotic stages represented in the top panel. **B.**  
683 Quantitation of the relative distance between Cy3-labeled nuclei and the distal tip in the  
684 germlines of the indicated genotypes. To account for potential variations in gonad size, the  
685 distance of Cy-3 labeled nuclei from the distal tip is divided by the length of the specific gonad  
686 from distal tip to late pachytene. Relative distance of Cy3-labeled nuclei = the distance of Cy3-  
687 labeled nuclei from the distal tip/the length of the specific gonad from distal tip to late pachytene  
688 x 100. At least four gonads were scored for each. Asterisks indicate statistical significance; P  
689 values calculated by the two-tailed Mann-Whitney test, 95% C.I.

690



691 **Figure 3. FNCM-1 promotes replication fork progression and SPR-5 is required for the S-**  
692 **phase checkpoint sensing the single-stranded DNA region formed upon lack of FNCM-1**

693 **A.** Immunolocalization of single-stranded DNA binding protein RPA-1 upon 3.5mM HU  
694 treatment in the premeiotic tip for the indicated genotypes. Bar, 2  $\mu$ m. **B.** Quantitation of the  
695 average number of mitotic nuclei within 40  $\mu$ m in the premeiotic tip region of the germlines  
696 from the indicated genotypes. Ratio represents the number of nuclei observed following HU  
697 treatment (+ HU) divided by the number observed without treatment (- HU). Asterisks indicate  
698 statistical significance compared to wild type control. P=0.0422 for *spr-5*, P =0.0095 for *fncm-1*  
699 *spr-5*. P values calculated by the two-tailed Mann-Whitney test, 95% C.I. **C.** S-phase DNA  
700 damage checkpoint activation is impaired in *spr-5* single and *fncm-1 spr-5* double mutants. Left,  
701 immunostaining for phospho CHK-1 (pCHK-1) on germline nuclei at the premeiotic tip  
702 following 3.5mM HU treatment. Bar, 2  $\mu$ m. Right, quantitation of pCHK-1 foci. P values  
703 calculated by the two-tailed Mann-Whitney test, 95% C.I.

704

705 **Figure 4. Proteins in the Fanconi anemia pathway and the histone demethylase SPR-5**  
706 **display a dynamic localization upon HU treatment and co-localize**

707 **A.** Immunolocalization of SPR-5, FCD-2 and FAN-1::GFP (FAN-1::GFP was detected with an  
708 anti-GFP antibody) upon 3.5mM HU treatment in the mitotically dividing germline nuclei  
709 (premeiotic tip, PMT). The localization pattern of SPR-5 and of the FA pathway components  
710 FCD-2 and FAN-1 is altered in response to replication stress (+HU). Bar, 2  $\mu$ m. **B.**  
711 Immunolocalization of FNCM-1::GFP and FCD-2 upon 3.5mM HU treatment in the premeiotic  
712 tip (PMT). FNCM-1 and FCD-2 co-localize on chromatin-associated foci (indicated by white  
713 arrows). Panel on the right shows that FNCM-1 re-localizes in response to replication stress

714 changing from a more diffuse to a more focal localization. The dispersed FNCM-1::GFP signal  
715 was not detected in control wild type (Supplemental figure 2). Bar, 2  $\mu$ m. **C.** Top, graphs  
716 showing Pearson co-localization correlation coefficient values indicate higher co-localization  
717 levels between FCD-2 and FNCM-1::GFP starting at the premeiotic tip (PMT) and slowly  
718 decreasing throughout meiosis (zones 1 and 2 = mitotic zone; zone 5 = mid-pachytene; zone 7 =  
719 late pachytene). Bottom left, mean numbers of Pearson co-localization correlation coefficient  
720 values between FCD-2 and FNCM-1::GFP for both mitotic (PMT) and meiotic (pachytene)  
721 zones with or without HU exposure.  $n > 5$  gonads. A value of 1 indicates that the patterns are  
722 perfectly similar, every pixel that contains Cy3 (FCD-2, red) also contains GFP (FNCM-1::GFP,  
723 green), while a value of -1 would mean that the patterns are perfectly opposite, every pixel that  
724 contains Cy3 does not contain GFP and vice versa. Bottom right, diagram of the *C. elegans*  
725 germline indicating the mitotic (zones 1 and 2) and meiotic stages (zones 5 and 7) represented in  
726 the top panel.

727

728 **Figure 5. SPR-5 and FNCM-1 co-localization is extended upon replication fork stalling**

729 **A.** Immunostaining of SPR-5 and FNCM-1::GFP (endogenous signal) in nuclei at either the  
730 premeiotic tip (PMT) or at pachytene in the presence or the absence of 3.5mM HU treatment.  
731 Bar, 2  $\mu$ m. **B.** Quantitation of Pearson co-localization correlation coefficient observed in A  
732 indicating that co-localization between SPR-5 and FNCM-1::GFP extends into the pachytene  
733 stage upon replication fork stalling. 1 indicates a perfect positive linear relationship between  
734 variables.  $P=0.0079$  for - and + HU treatment in the pachytene stage. P values calculated by the  
735 two-tailed Mann-Whitney test, 95% C.I.

736

737 **Figure 6. FNCM-1 and FCD-2 are necessary for maintaining H3K4 dimethylation levels**

738 **A. Top**, Western blot analysis comparing H3K4me2 levels with histone H3 and alpha-tubulin  
739 antibodies for the indicated genotypes either in the absence or presence of HU (3.5mM). **Bottom**,  
740 Quantitation of H3K4me2 levels normalized against either histone H3 or alpha-tubulin. Signal  
741 intensity was measured with GelQuant.net. Numbers represent average for data from three  
742 independent experiments. SEM (standard error of mean) values are presented in parentheses. **B.**  
743 Western blot analysis comparing the levels of SPR-5 normalized against alpha-tubulin for the  
744 indicated genotypes upon absence or presence of 3.5mM HU treatment.

745

746 **Figure 7. The FA pathway and SPR-5 cooperate in DNA repair and regulation of histone**  
747 **demethylation**

748 **a.** *C. elegans* FNCM-1 is required for recruiting FCD-2 and its downstream nuclease FAN-1 in  
749 the germline. The potential helicase/translocase domain in FNCM-1 is necessary for this process.  
750 **b.** SPR-5 and FNCM-1 interact with each other and their co-localization in the germline is  
751 extended under conditions leading to stalled replication forks. **c.** FNCM-1 and FCD-2 are  
752 necessary for maintaining proper H3K4 dimethylation levels. **d.** SPR-5-dependent S-phase  
753 checkpoint activation is required in response to the single-stranded DNA region formed in the  
754 absence of FNCM-1 in germline nuclei.

755

756 **SUPPLEMENTAL FIGURE LEGENDS**

757

758 **Supplemental figure 1. *spr-5::GFP::HA* animals generated by CRISPR-Cas9 do not display**  
759 **either sensitivity against exogenous DSBs induced by  $\gamma$ -IR (Left) or embryonic lethality**

760 **(Right). Left**, Normalized embryonic survival (shown as % hatching) was reduced in *spr-5* null  
761 mutants, but not in *spr-5::GFP::HA* worms, compared to control wild type animals following  
762 treatment with  $\gamma$ -irradiation (50 Gy), suggesting that insertion of the dual tags at the *spr-5* locus  
763 do not alter SPR-5 expression. 89% for wild type, 61% for *spr-5* and 98% for *spr-5::GFP::HA*.  
764  $P=0.0175$  for *spr-5* compared to wild type by the two-tailed Mann-Whitney test, 95% C.I.  
765  $P=0.0065$  for *spr-5* compared to *spr-5::GFP::HA*.  $P=0.0931$  for *spr-5::GFP::HA* worms  
766 compared to wild type. **Right**, *spr-5::GFP::HA* animals generated by CRISPR-Cas9 do not  
767 display embryonic lethality as in *spr-5* mutants. Embryonic survival was scored among the  
768 progeny of worms of the indicated genotypes.  $P=0.0027$  for *spr-5* compared to *spr-5::GFP::HA*.  
769 Error bars represent standard error of the mean.  $n =$  at least 36 for each genotype.

770

771 **Supplemental figure 2. FNCM-1::GFP::FLAG co-localizes with FCD-2 and exhibits**  
772 **normal brood size.**

773 **A.** Endogenous FNCM-1::GFP::FLAG expression was detected as both foci on DAPI-stained  
774 chromatin as well as a dispersed signal observed throughout the germline, which was not  
775 detected in wild type. Localization of FNCM-1::GFP::FLAG clearly corresponded to FCD-2  
776 indicated with white arrows. **B.** The *fncm-1::GFP::FLAG* tag line displayed a brood size similar  
777 to wild type and significantly different (\*) from *fncm-1* mutants suggesting that the *fncm-*  
778 *1::GFP::FLAG* transgenic line expressed wild type FNCM-1. Mean number of eggs laid per  
779 adult was 239 for wild type, 157 for *fncm-1*, and 249 for *fncm-1::GFP::FLAG*.  $P=0.0004$  for  
780 *fncm-1* and *fncm-1::GFP::FLAG*.  $P=0.2234$  for wild type and *fncm-1::GFP::FLAG*.

781

782 **Supplemental figure 3. Defective checkpoint activation observed in *spr-5* mutants is HU**

783 **dose-dependent**

784 S-phase DNA damage checkpoint activation is impaired in *spr-5* mutants at a lower (3.5mM) but

785 not at a higher (5.5mM) dose of HU. Immunostaining for phospho CHK-1 (pCHK-1) of mitotic

786 nuclei (premeiotic tip) in the germline following either 3.5 or 5.5mM HU treatment. Bar, 2  $\mu$ m.

787

788 **Table 1. SPR-5 interacting proteins identified by liquid chromatography-mass**  
789 **spectrometry (LC-MS) analysis.**

| <b>Protein<br/>Name</b> | <b>SPR-5::GFP::HA</b> | <b>Control</b> |
|-------------------------|-----------------------|----------------|
| RCOR-1                  | 45                    | Not detected   |
| SPR-1                   | 18                    | Not detected   |
| SPR-5                   | 268                   | Not detected   |
| FNCM-1                  | 3                     | Not detected   |

790

791 Immunoprecipitations from *spr-5::GFP::HA* and wild type (N2) whole worm extracts with  
792 antibodies against either HA or GFP were analyzed by LC-MS. The Fanconi anemia FANCM  
793 homolog in *C. elegans*, FNCM-1, was identified with both anti-HA and anti-GFP antibodies. The  
794 wild type (N2) extract was used as a negative control to remove false positive hits. SPR-5  
795 interacting proteins that were identified in both anti-HA and anti-GFP pull-downs are listed.  
796 Numbers indicate the total mass spectra collected from two samples.

797

**Figure 1**

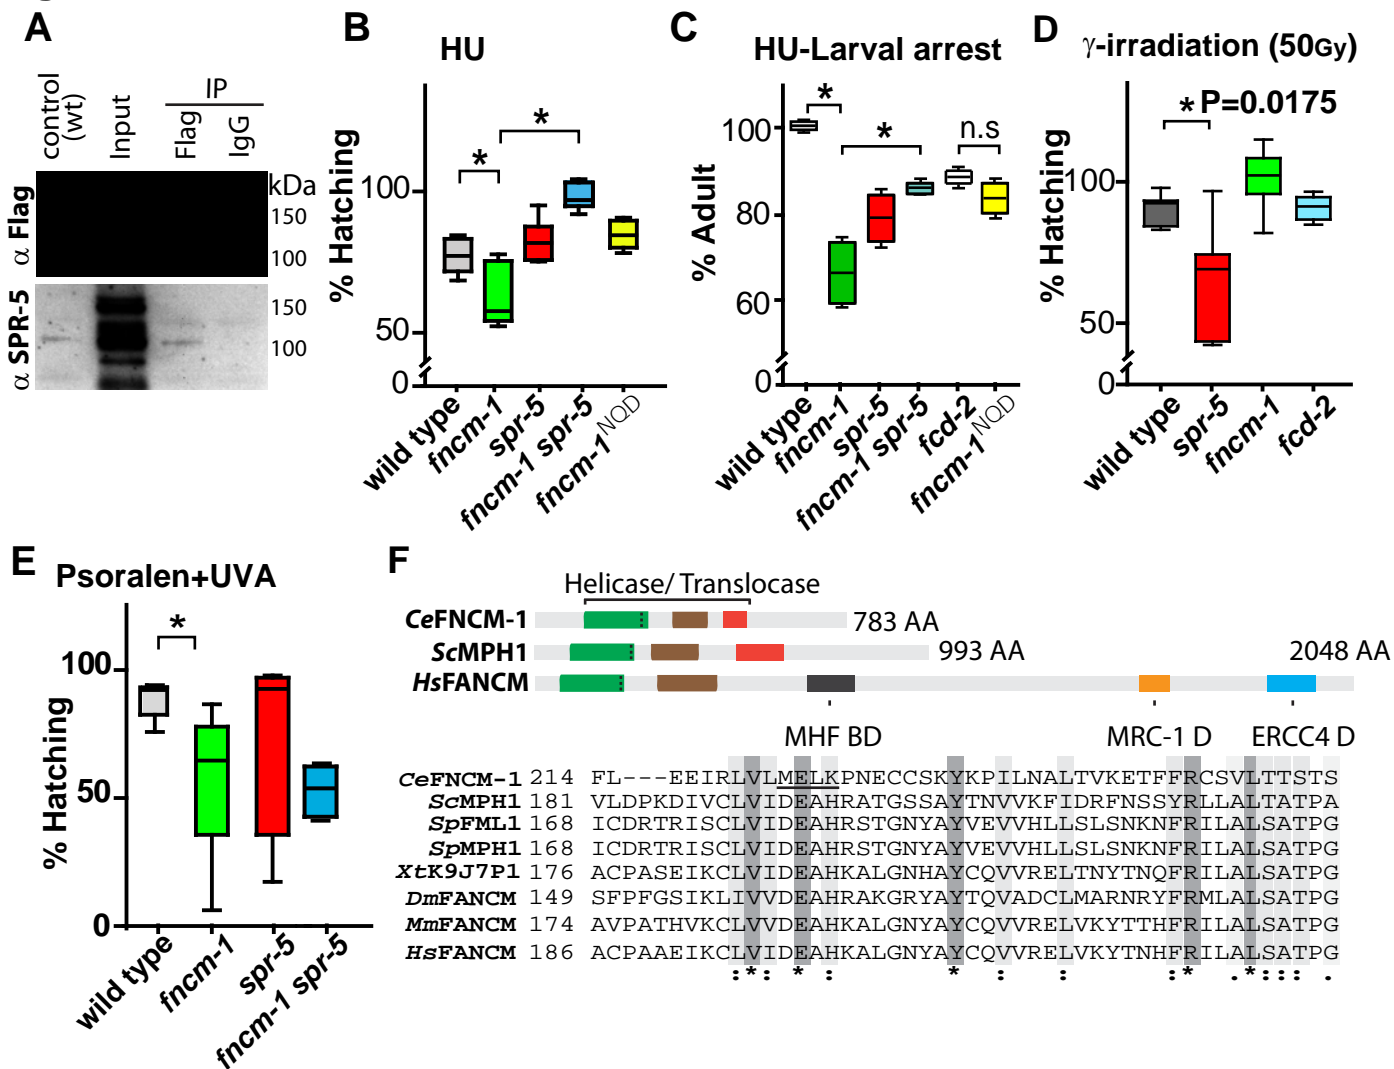

Figure 2

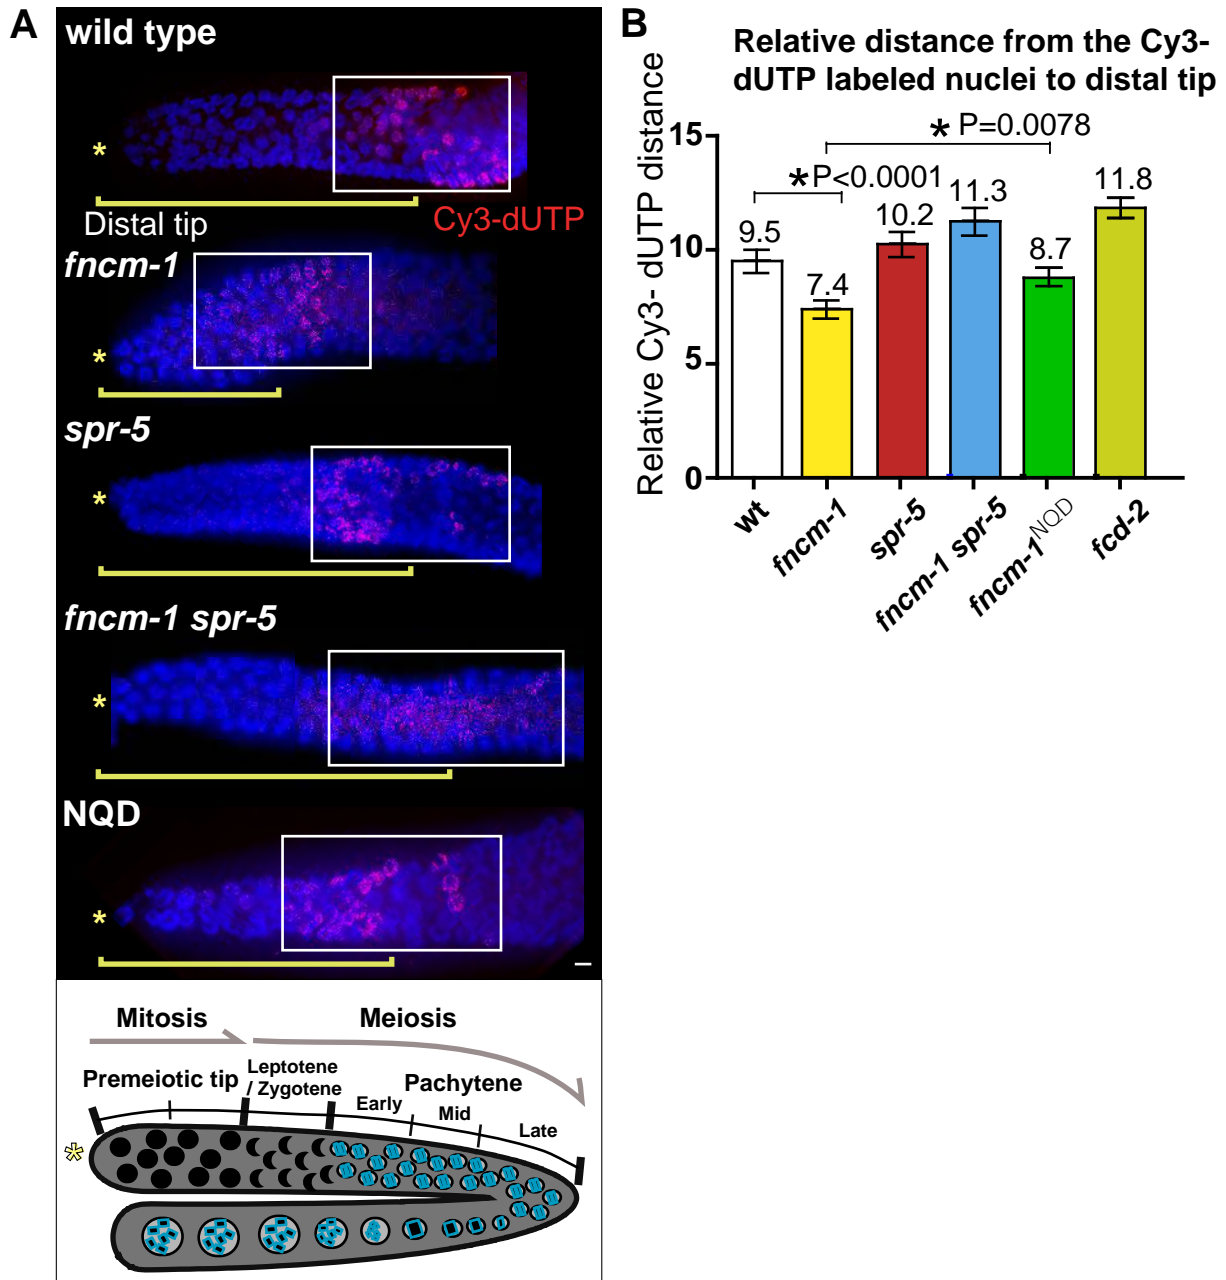



## Figure 3

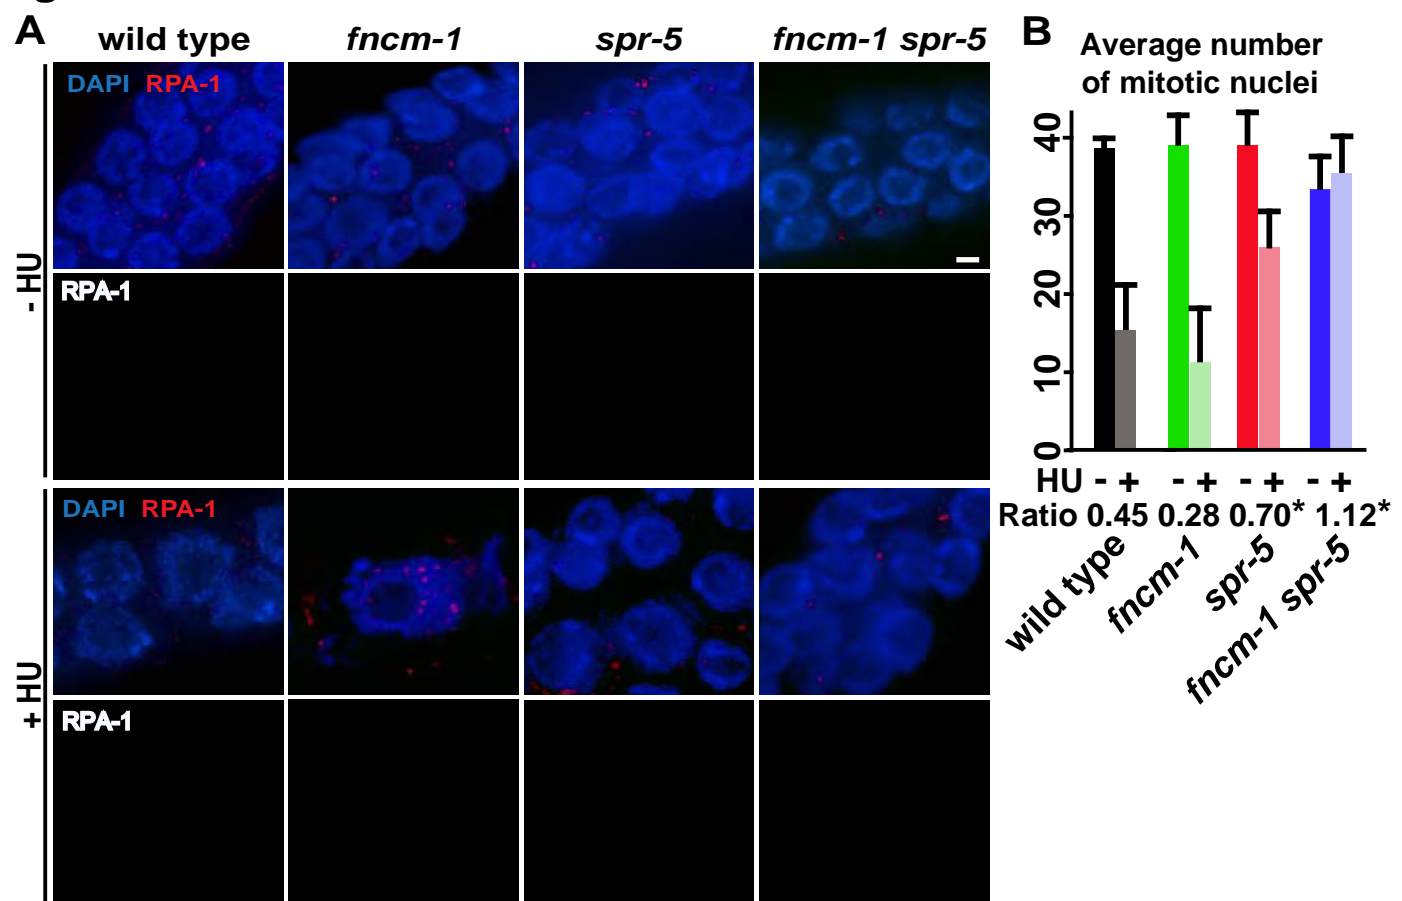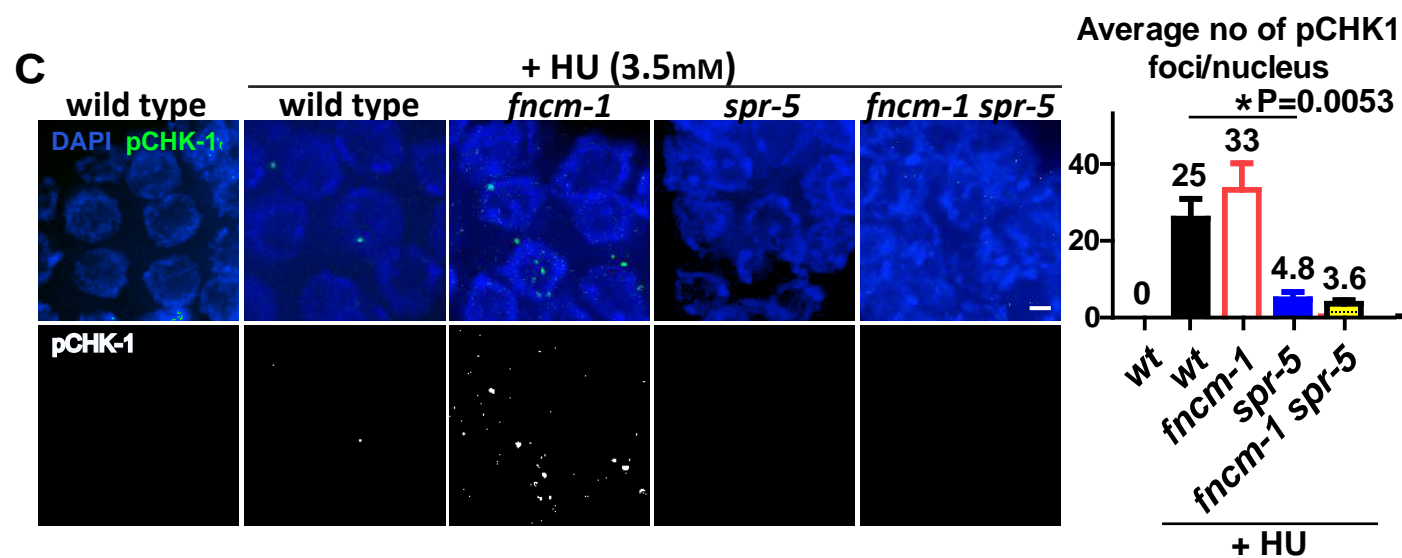

## Figure 4

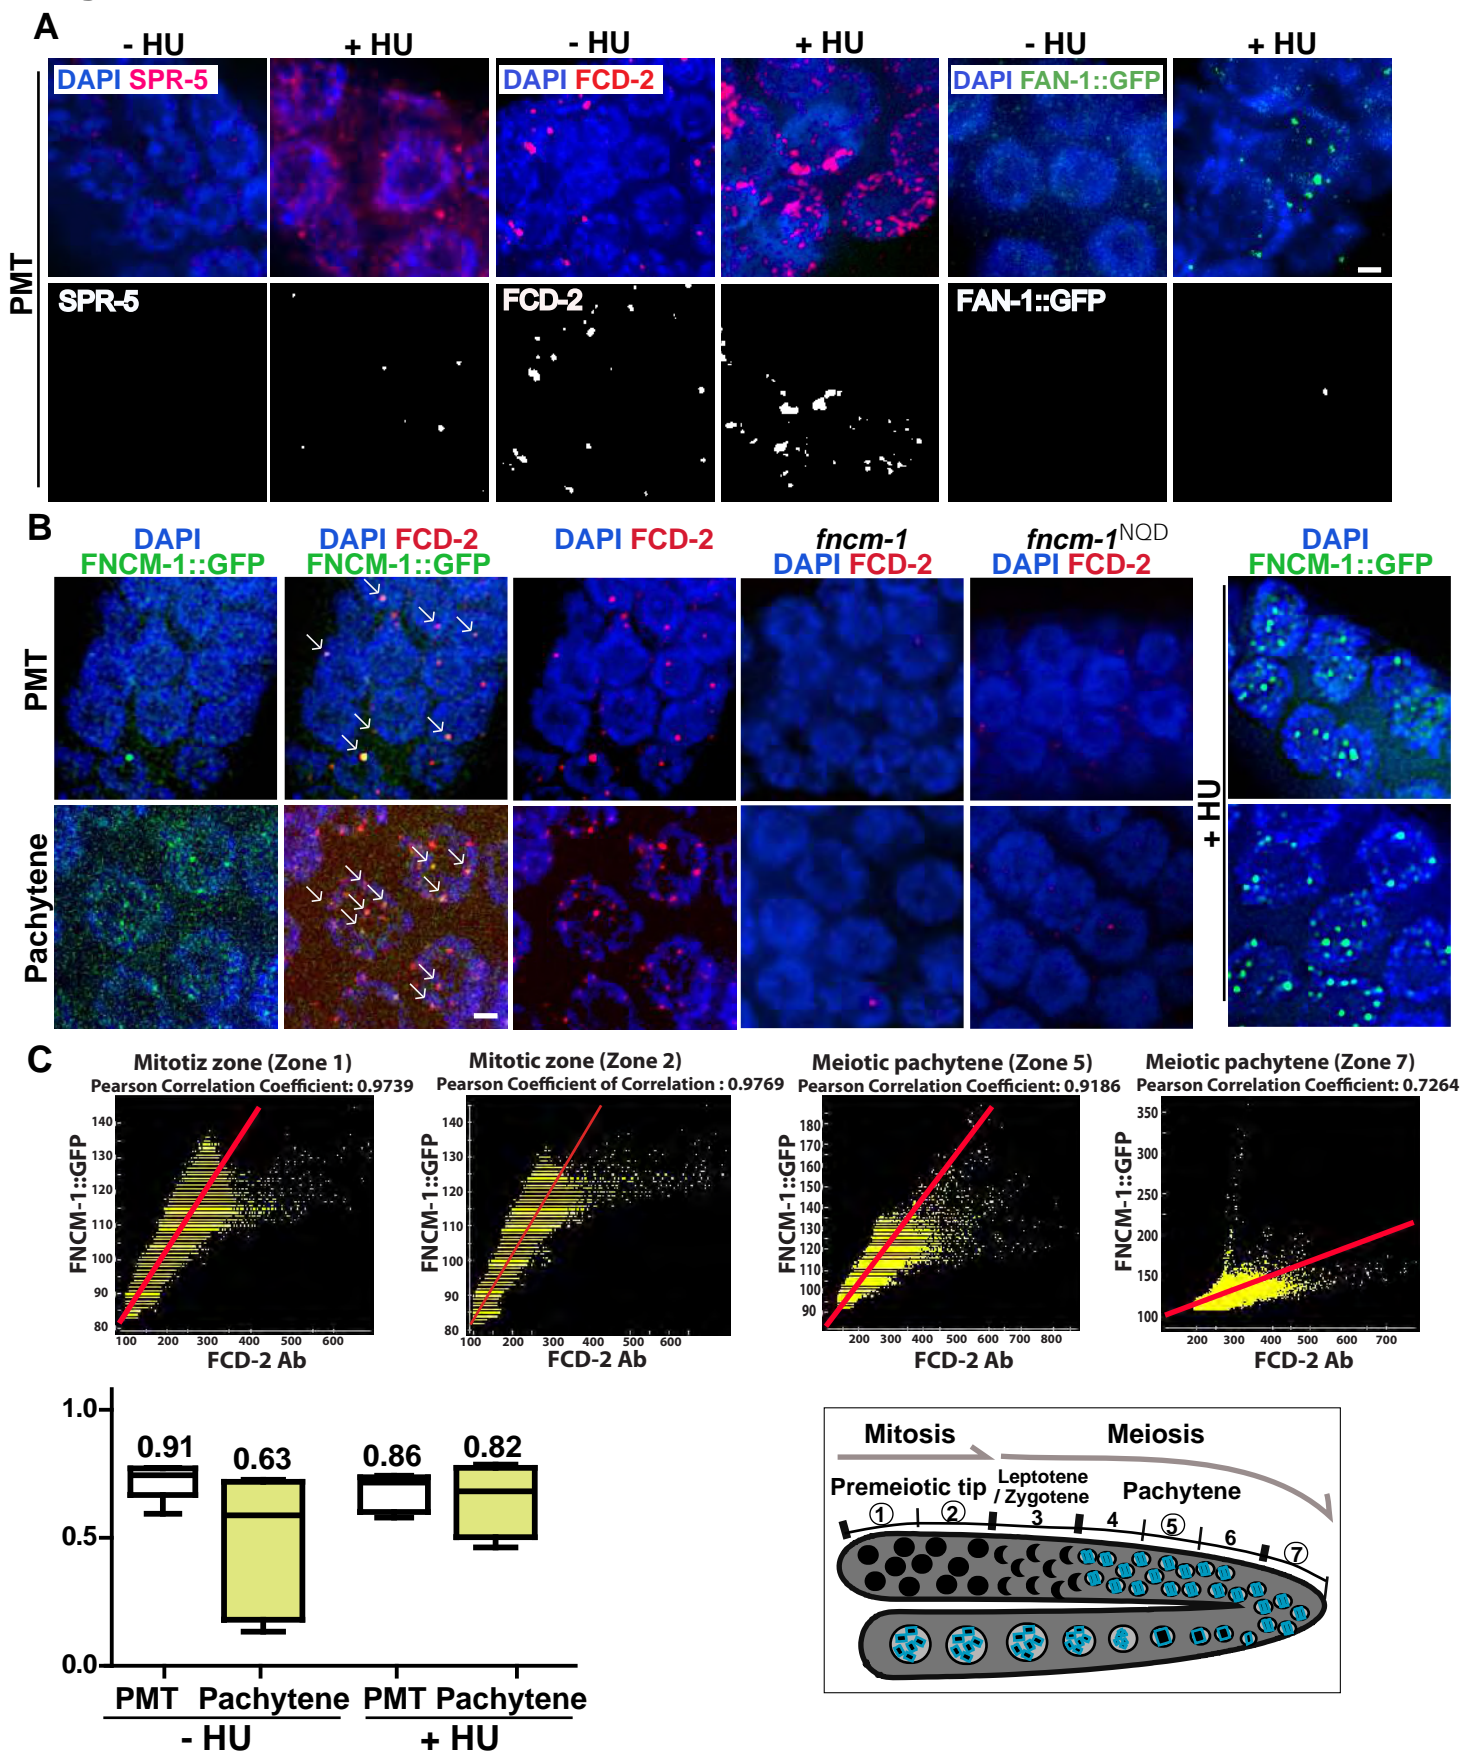

Figure 5

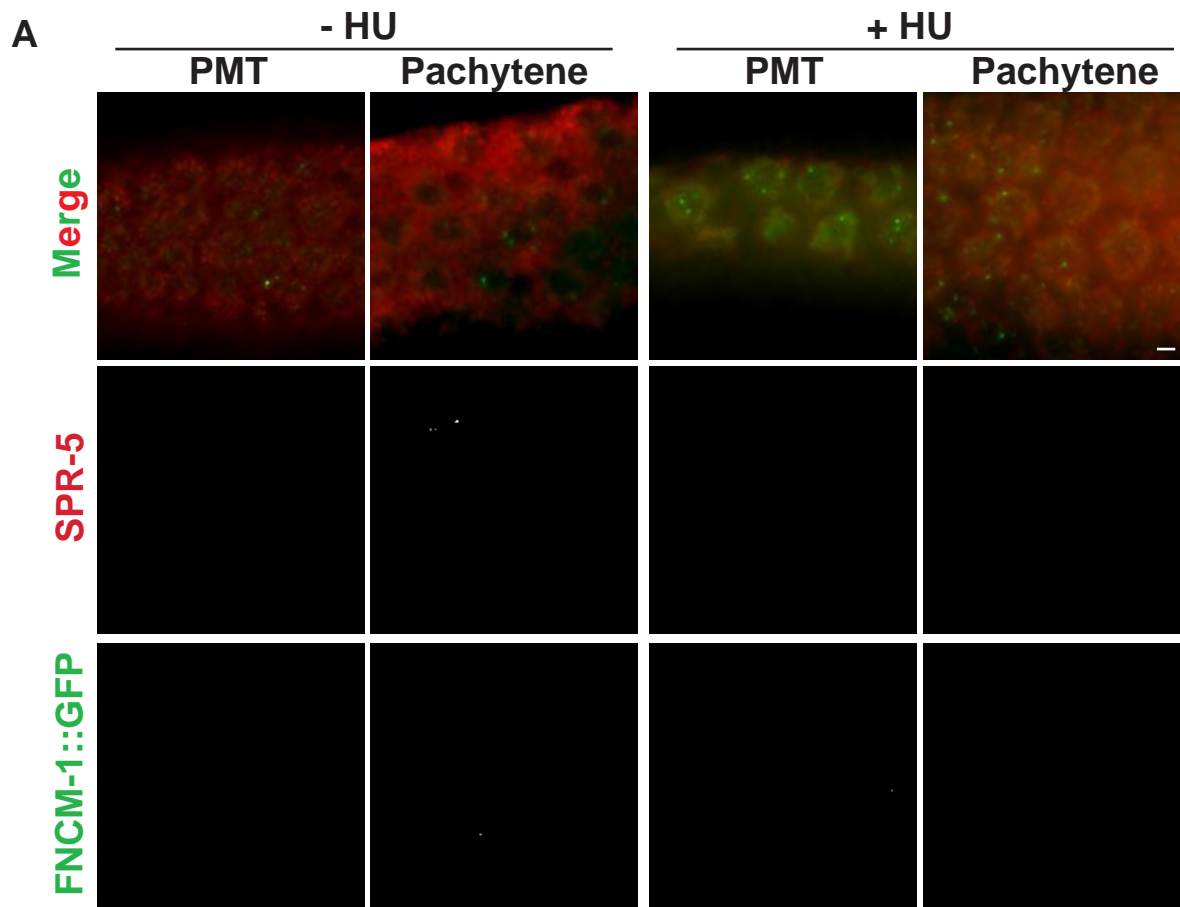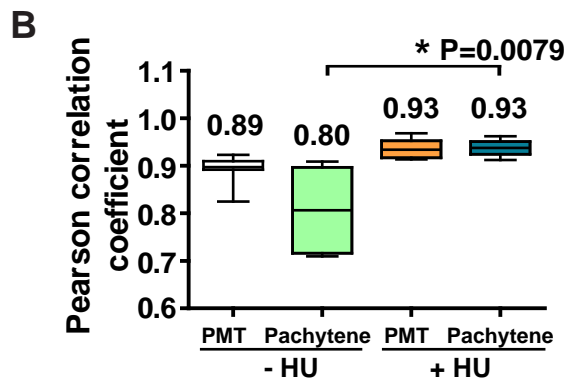

# Figure 6

bioRxiv preprint doi: <https://doi.org/10.1101/265876>; this version posted February 14, 2018. The copyright holder for this preprint (which was not certified by peer review) is the author/funder. All rights reserved. No reuse allowed without permission.

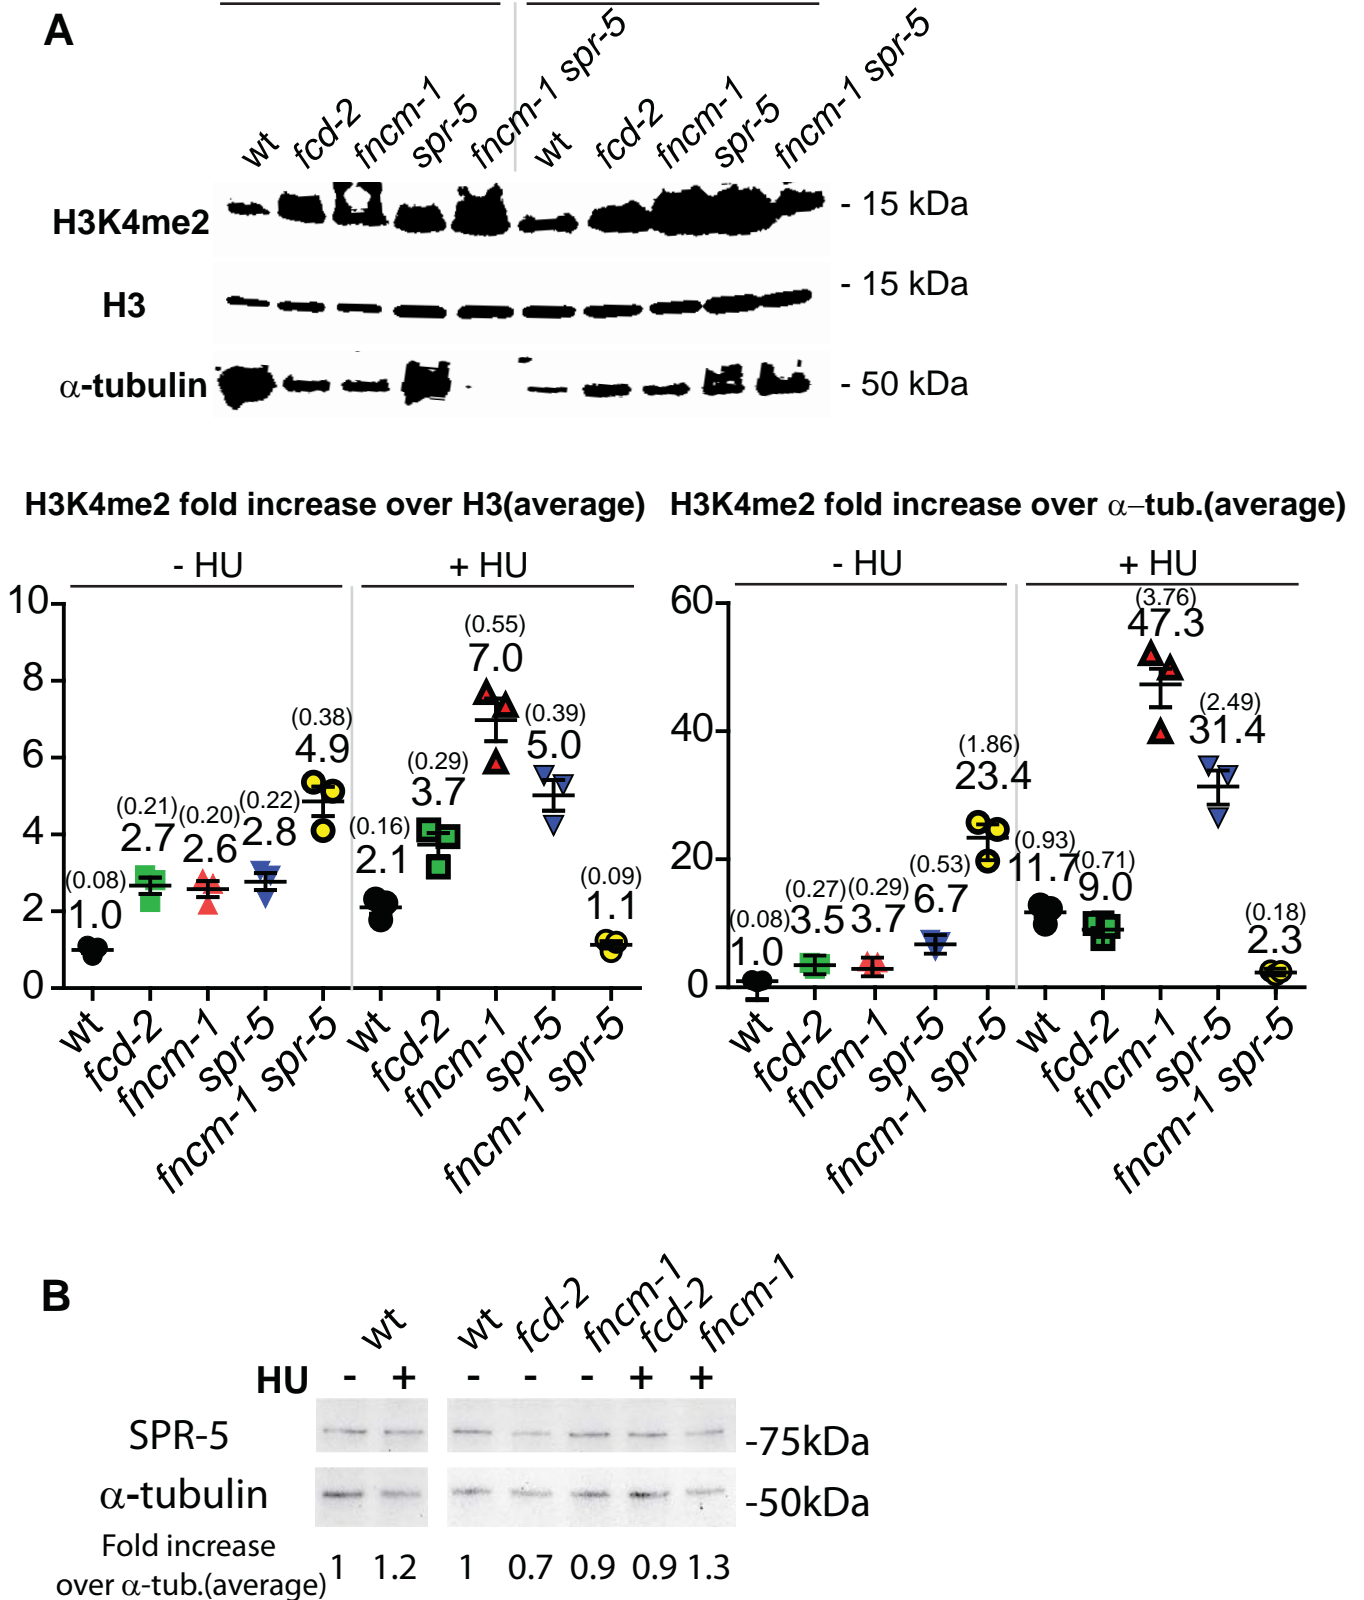

## Figure 7

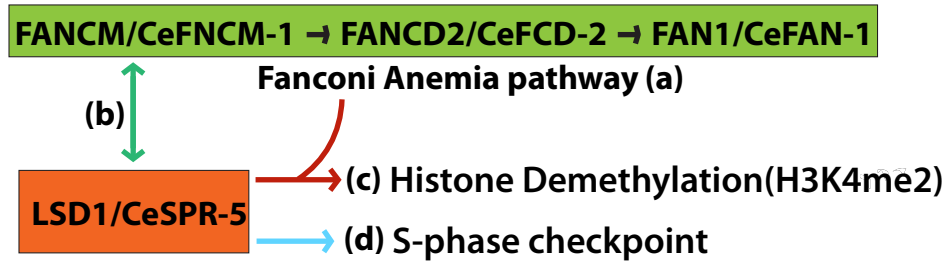

## Supplemental figure 1

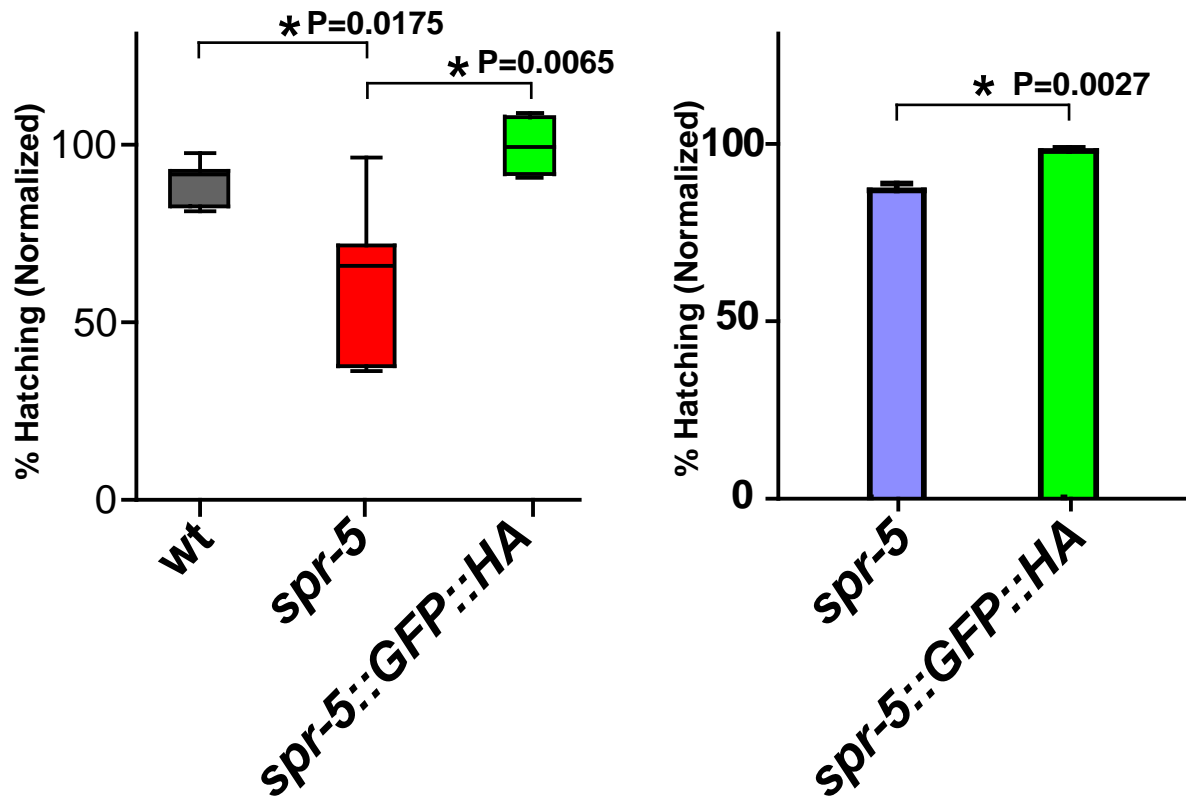

## Supplemental figure 2

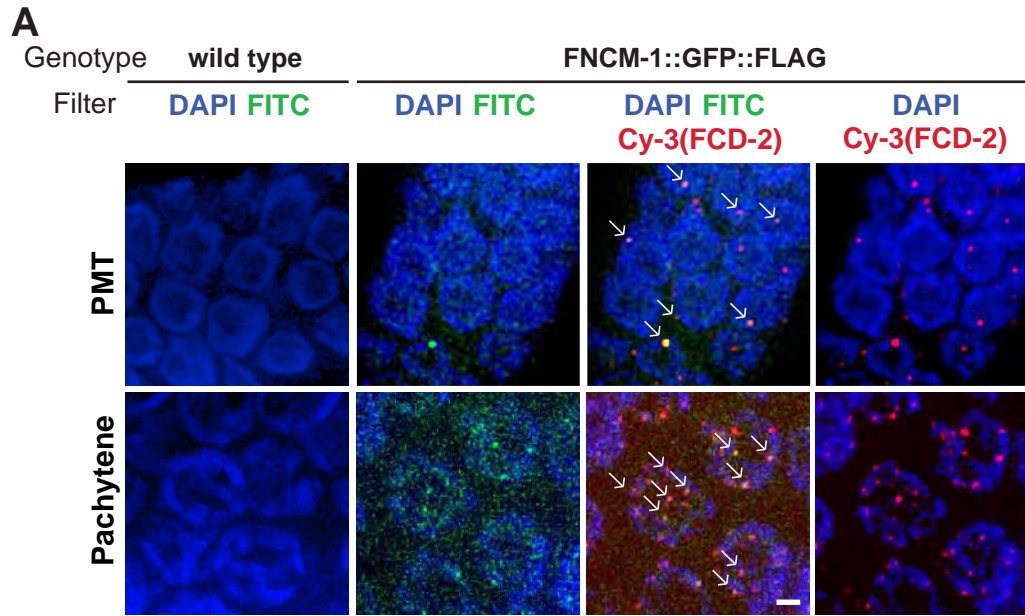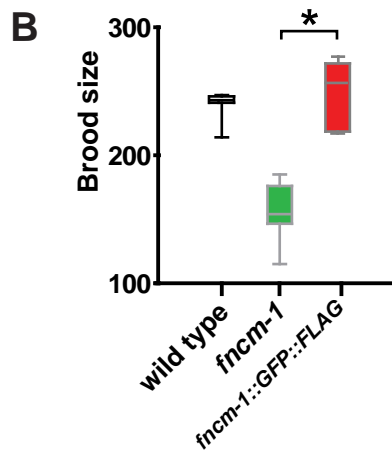



### Supplemental figure 3

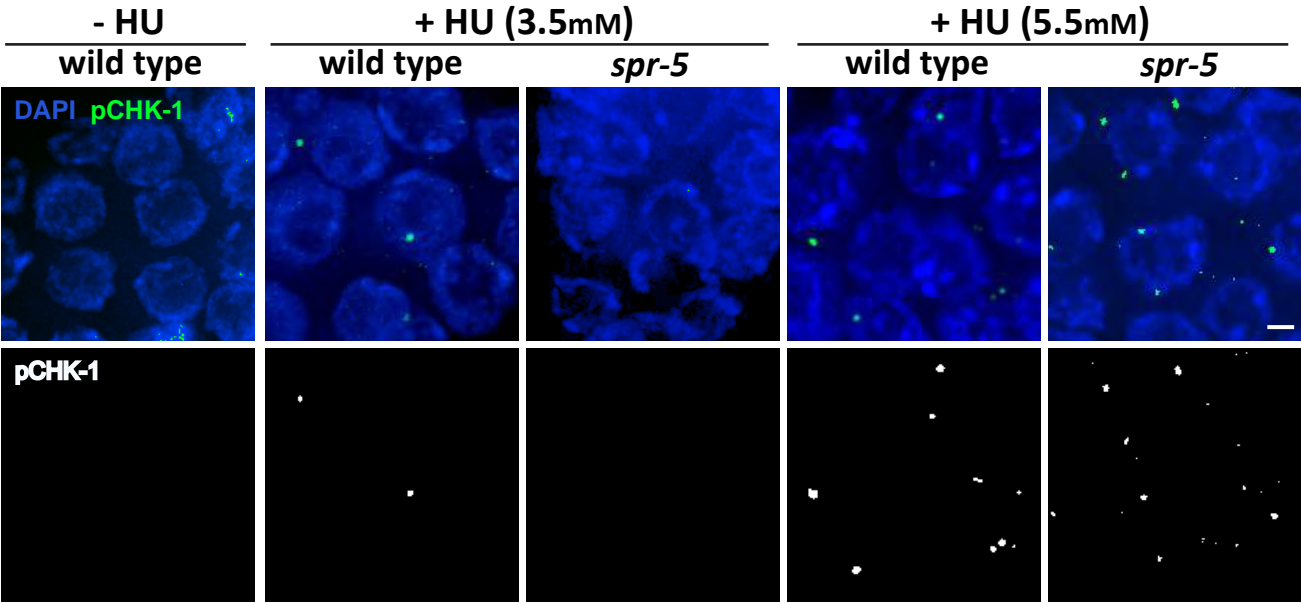

Source: https://www.biorxiv.org/content/10.1101/265876v1.full.pdf
